# Supplementary material for: Deep targeted sequencing of TP53 in chronic lymphocytic leukemia: clinical impact at diagnosis and at time of treatment
Source: PubMed Central journal article supplement — Haematologica. 2018 Dec 4;104(4):789–96. doi: 10.3324/haematol.2018.195818 (PMC6442964; doi:10.3324/haematol.2018.195818), 2019-04

## Deep targeted sequencing of *TP53* in chronic lymphocytic leukemia: clinical impact at diagnosis and at time of treatment

Christian Brieghel,<sup>1</sup> Savvas Kinalis,<sup>2</sup> Christina W. Yde,<sup>2</sup> Ane Y. Schmidt,<sup>2</sup> Lars Jønson,<sup>2</sup> Michael A. Andersen,<sup>1</sup> Caspar da Cunha-Bang,<sup>1</sup> Lone B. Pedersen,<sup>1</sup> Christian H. Geisler,<sup>1</sup> Finn C. Nielsen<sup>2</sup> and Carsten U. Niemann<sup>1</sup>

<sup>1</sup>Department of Hematology, Rigshospitalet and <sup>2</sup>Center for Genomic Medicine, Rigshospitalet, Copenhagen, Denmark

©2019 Ferrata Storti Foundation. This is an open-access paper. doi:10.3324/haematol.2018.195818

Received: April 17, 2018.

Accepted: November 23, 2018.

Pre-published: December 4, 2018.

Correspondence: *CARSTEN U. NIEMANN*

carsten.utoft.niemann@regionh.dk

---

## Supplementary information

Deep targeted sequencing of *TP53* in chronic lymphocytic leukemia:  
clinical impact at diagnosis and at time of treatment.

Christian Brieghel<sup>1</sup>, Savvas Kinalis<sup>2</sup>, Christina W. Yde<sup>2</sup>, Ane Y. Schmidt<sup>2</sup>, Lars Jønson<sup>2</sup>, Michael A. Andersen<sup>1</sup>, Caspar da Cunha-Bang<sup>1</sup>, Lone B. Pedersen<sup>1</sup>, Christian Geisler<sup>1</sup>, Finn C. Nielsen<sup>2</sup>, and Carsten U. Niemann<sup>1</sup>.

1. Department of Hematology, Rigshospitalet, Copenhagen, Denmark.
2. Center for Genomic Medicine, Rigshospitalet, Copenhagen, Denmark.

## Content

Supplemental methods

Supplemental results

Supplemental references

Supplemental table legends

Table S1: *TP53* mutations in 8 test samples with del(17p)

Table S2: Primers for PCR amplification of *TP53*

Table S3: Contingency tables

Table S4: *TP53* mutations identified by dilution match algorithm and stereotypic error model

Table S5: Excluded *TP53* mutations

Table S6: Validation by droplet digital PCR

Table S7: Patient characteristics in newly diagnosed patients stratified according to *TP53* and IGHV mutational status

Table S8: Patient characteristics patients at time of treatment stratified according to *TP53* and IGHV mutational status

Supplemental figure legends

Figure S1: Consort diagram of patients included in the study

Figure S2: Establishing the limit of detection and range of dilution grade

Figure S3: Determining a dilution match

Figure S4: Modeling stereotypic errors

Figure S5: Limit of detection for stereotypic error model

Figure S6: Schematic workflow of bioinformatic pipeline

Figure S7: Stereotypic error distribution of problematic variants

Figure S8: Subanalysis of overall and treatment-free survival in newly diagnosed patients

## Supplemental methods

### Deep-targeted sequencing

Peripheral blood mononuclear cells (PBMC) were isolated from fresh EDTA blood with Lymphoprep (Axis-Shield, Oslo, Norway). Genomic DNA was extracted using QIAamp DNA Blood Midi kit (Qiagen, Hilden, Germany) and quantified on a Qubit® 2.0 fluorometer (Thermo Fisher Scientific, Waltham, MA, USA). The SU-DHL4 cell line was cultured in 90% RPMI 1640 media, 19% FCS, and 1% streptomycin at 37°C. Primers were designed to flank *TP53* exons 2-10 (RefSeq NM\_00546.5) including splicing sites with 2 bp intronic overlap. We used one primer-pair for exons 2, 3, 7, 8, and 10, two primer-pairs for exon 5 and 9, while exon 4 was covered using 4 primer-pairs. Patient samples were amplified using Phusion® Hot Start II High-Fidelity DNA polymerase (Thermo Fisher Scientific) with 30 cycles of PCR. Library preparation was performed on a SciClone G3 Liquid Handling Workstation (Perkin Elmer, Waltham, MA, USA) according to the manufacturer's protocol: KAPA DNA Library Preparation, Rev 1 (Roche Nimblegen, Madison, WI, USA). In brief, amplicons were purified using SeqCap Pure Capture Bead Kit containing AMPure® XP Beads (Beckman, Brea, CA, USA). Following end repair and poly(A)-tailing, adaptor ligation was performed with SeqCap Adapter Kit A and B (Roche NimbleGen) or NEXTflex™ DNA Barcodes 96 (Bioo Scientific, Austin, TX, USA). Following seven cycles of PCR and an additional AMPure step, libraries were pooled either 24 or 96 samples per lane and sequenced as paired-end on a HiSeq2500. Using HiSeq® SBS Kit v4 (2x125 base PE; Illumina, San Diego, CA, US), 75% of reads in the target region were paired.

### Determination of sensitivity of the assay

To establish the sensitivity of the *TP53* mutation assay, serial dilution of Sanger validated *TP53* mutations (*TP53*mut<sub>s</sub>) were sequenced. Pilot study samples were handled as described above using only SeqCap Adapters (Roche NimbleGen) and sequenced as paired-end on a MiSeq using MiSeq Reagent Kit v2 (Illumina, 2x250 base PE). With mutations detected as low as 0.023% variant allele frequency (VAF), the limit of detection (LOD) was established at 0.2% VAF while a dilution step (dilution factor 5) was included to increase the robustness of the assay (Figure S2A). By subtraction of the VAF from variants called in pure cell line DNA, the correlation between dilution grade and detected VAF was improved ( $r^2 > 0.9957$  vs  $r^2 > 0.9967$ , squared Pearson's correlation coefficient). Thus, this approach was chosen for future analyses, replacing any negative adjusted VAF with zero. The range of the dilution step and the ability to detect insertions and deletions (indels) was confirmed based on similar serial dilution of patient samples with known *TP53* indels (Figure S2B). Finally, the performance of the assay was evaluated assessing eight del(17p) samples with unknown *TP53* mutational status. As expected, seven of eight samples harbored *TP53* mutations (Table S1).

### Bioinformatic workflow

Based on the pilot studies, a workflow for detection of low burden variants was developed in CLC Biomedical Genomics Workbench 3.0 (CLC BGW, Qiagen). Paired reads were trimmed 20 bp 5' to

remove primers and 1 bp 3' to remove bad quality reads further allowing for a quality-score of 0.01. Reads were mapped to the hg19 (ensembl GRCh37.73) reference genome and realigned using 2 multipasses. Directional frequency filter was set to zero to ensure variant calls in unpaired reads (25% of target region). The combined call of both a low frequency (VAF  $\geq 0.001\%$ ) and basic variant detection tool (VAF  $\geq 2\%$ ) were used to ensure detection of both high and low burden mutations. To describe the distribution of inevitable low frequency errors (error distribution), all variants with a minimum of 1 variant read and VAF  $\geq 0.001\%$  were called.

## Dilution match algorithm

In analyses downstream of CLC BGW, the adjusted dilution ratios (aDRs) and the dilution grades (DGs: reference allele frequency of p.Arg273Cys) were plotted and expected to match a line with a slope of one (Figure S3A). However, a cluster with aDRs around 1 (i.e. a distance to a line with slope of 1 above 0.5) was also observed and consequently excluded. We next calculated the 99.9% reference range (mean  $\pm$  3.27 SD) of remaining distances to a line with a slope of 1 and trimmed the reference range to an absolute distance  $\leq 0.16$ . Variants within this distance were considered to have a dilution match (Figure S3B).

$$\left| \left( \text{RAF}(p.R273C)_{\text{diluted}} - \frac{\text{VAF}_{\text{diluted}} - \text{DHL4 VAF}_{\text{undiluted}}}{\text{VAF}_{\text{undiluted}} - \text{DHL4 VAF}_{\text{undiluted}}} \right) \right| \leq 0.16$$

*Dilution match algorithm*

## Stereotypic error model

We further modeled the distribution of stereotypic errors<sup>1</sup> to identify outliers considered as true mutations.<sup>2</sup> As modeling of variant reads included inevitable differences in read depth (coverage), we modeled VAF in two steps as summarized in Figures S4-S6. First, each unique genomic position including nucleotide change (e.g. g.17:7579472G>C) were grouped and modeled only if observed in 20 samples or more. Secondly, we grouped each unique nucleotide change (e.g. A>T) and modeled only if observed in 20 samples or more. Extreme outliers were excluded from modeling by truncating VAFs that were further than 2 and 4 standard deviations (SDs) from the mean of the log transformed VAF distributions. Subsequently, truncated VAFs were modeled to fit gamma distributions that allowed us to identify outliers using Bonferroni adjusted right-sided *P*-values of  $10^{-2}$ ,  $10^{-4}$ , and  $10^{-6}$ . Unfit for modeling, variants with a rare nucleotide change observed in less than 20 samples were called with a LOD of 2% VAF. Due to the design of the dilution match algorithm, c.817C>T (p.Arg273Cys) could not be modeled by this approach. Thus, this mutation was called with a LOD of 2% VAF.

## Reporting variant findings

Variants identified by the dilution match algorithm (DMA) and stereotypic error model (SEM) with a minimum of 10 variant reads and a VAF  $\geq 0.2\%$  were called and referenced in the IARC *TP53* database (<http://p53.iarc.fr>) excluding validated polymorphisms, synonymous mutations and mutations predicted to encode functional p53 (Table S5).

Comparison of results from the DMA and SEM was performed with 2x2 contingency tables using combinations of annotated *P*-values and SDs for LODs 0.2%, 0.3%, and 1% VAF to evaluate the performance of both methods (Table S3). The three LODs represented our threshold, the lower threshold used in previous publications,<sup>2-4</sup> and the threshold of minor *TP53* mutations,<sup>3</sup> respectively.

All analyses downstream of CLC BGW were performed with R version 3.4.1 using packages tidyverse, fitdistrplus, robustHD, epiR, Publish, survival and survminer.<sup>5</sup> Source code is available upon request.

### **Validation by droplet digital PCR and capture based NGS**

Droplet digital PCR (ddPCR) was used to validate the first 30 low burden *TP53* mutations. Genomic DNA was fragmented to approximately 150 bp using S220 Focused-ultrasonicator (Covaris, Woburn, MA, USA). Custom made allele specific Prime Assay™ probes (Bio-Rad, Hercules, CA, USA) were added to triplicates of fragmented DNA from either *TP53* aberrated patients or healthy donors. Water acted as non-template controls. Following droplet generation and 39 cycles of PCR using ddPCR Supermix for Probes (no dUTP, Bio-Rad), fluorescent FAM and HEX signals were read and analyzed on QX200™ Droplet Digital™ PCR System using QuantaSoft™ 1.7 (Bio-Rad).

Samples from newly diagnosed patients referred between 2008 and 2014 were sequenced using a custom made SeqCap EZ Choice gene panel (Roche Nimblegen) containing *TP53* exons 2-10. DNA extracted from peripheral blood mononuclear cells (PBMC) was fragmented (Covaris) and purified using AMPure XP Beads (Beckman). Following end repair and poly(A)-tailing, fragments were adaptor ligated using NEXTflex™ DNA Barcodes 96 (Bioo Scientific) using KAPA Library Preparation Kit (Roche NimbleGen) and amplified with 7 cycles of PCR. Pooled libraries were hybridized twice using SeqCap EZ Kit (Roche NimbleGen) to capture target regions and sequenced as pair-end on a HiSeq2500 using HiSeq® SBS Kit v4 (2x125 base PE; Illumina). All samples were sequenced in a single HiSeq run to obtain 80% of output and subsequently analyzed in CLC BGW allowing for a VAF >1%. CLC BGW workflow is available upon request.

### **Evaluation of CLL cell fraction by flow cytometry**

To evaluate the fraction of CLL cells in purified PBMCs, we reanalyzed the diagnostic fcs files. Samples were originally run on a FACSCalibur or FACSCanto II (BD, Franklin Lakes, NJ, USA). Reanalysis was performed using FlowJo® vX.0.7 (Flowjo, Ashland, OR, USA). The fraction of CLL cells (CD5+, CD19+) was calculated from mononuclear cells gated by CD45 and SSC.

## Supplemental results

SEM identified a c.848G>A (p.Arg283His) in 45 patients (range: 0.20-0.43% VAF, Figure S7A). However, none of these were positive by DMA. This specific mutation was considered low frequent noise and excluded from downstream analyses comparing DMA and SEM. Four variants were only detected by DMA including three c.848\_849delGC (p.Arg283fs\*22) positioned at a problematic position with a wide distribution of background noise (Figure S7 A-B) and one c.488A>G (p.Tyr163Cys) that was validated by ddPCR but excluded based on SEM modeled on only 24 events (Figure S7C). Twenty-two variants were only detected by SEM. This included one c.338T>G (p.Phe113Cys) identified at 0.6% VAF, while the remaining 21 variants fell below 0.3% VAF (Table S4); the LOD applied in previous studies.<sup>2, 4</sup> All 70 true negative variants with VAF  $\geq$ 1% excluded by both the SEM and the DMA consisted of a splicing site variant c.74+2T>G. This variant showed a multimodal distribution considered unfit for modeling and is thought to be a mapping error rather than a result of PCR (Figure S7D).

Due to redundant mutations, validation of the initial 20 *TP53*mut by ddPCR included 30 low burden *TP53*mut (VAF  $\leq$ 10%) with a median VAF of 0.91% (IQR: 0.41-2.95%). All tested samples were validated (Table S6). In addition, three high burden *TP53*mut (VAF >10%) and two minor *TP53*mut (VAF <1%) called with a LOD of 0.1% VAF were also validated. Among *TP53*mut above 1% VAF tested by capture based targeted NGS, 24 (92%) were validated: 2 mutations could not be validated (VAF of 1.2% and 2.9%, Table S4).

## Supplemental references

1. Newman AM, Lovejoy AF, Klass DM, et al. Integrated digital error suppression for improved detection of circulating tumor DNA. *Nat Biotechnol.* 2016;34(5):547-555.
2. Rossi D, Khiabani H, Spina V, et al. Clinical impact of small TP53 mutated subclones in chronic lymphocytic leukemia. *Blood.* 2014;123(14):2139-2147.
3. Malcikova J, Stano-Kozubik K, Tichy B, et al. Detailed analysis of therapy-driven clonal evolution of TP53 mutations in chronic lymphocytic leukemia. *Leukemia.* 2015;29(877-885).
4. Nadeu F, Delgado J, Royo C, et al. Clinical impact of clonal and subclonal TP53, SF3B1, BIRC3, NOTCH1, and ATM mutations in chronic lymphocytic leukemia. *Blood.* 2016;127(17):2122-2130.
5. Team RC. R: A Language and Environment for Statistical Computing. 2017.

## Supplemental table legends

**Table S1.** Analysis of 8 del(17p) test samples with unknown *TP53* status. Nine *TP53* mutations were identified in the 7 of the 8 samples using the dilution match algorithm. Dilution grade (DG) and dilution ratio (DR) were highly similar with short distances from a slope of one (DFSO = DG - DR).

**Table S2.** The primers used for PCR amplification of *TP53* exons 2-10.

**Table S3.** Contingency tables show results for the entire study cohort (n=308) of the dilution match algorithm (DMA) and stereotypic error modeling (SEM) at three different limits of detection (LOD of VAF  $\geq 0.2\%$ , VAF  $\geq 0.3\%$ , and VAF  $\geq 1\%$ ) and 6 different SEM settings (*P*-values and SD). Standard deviations (SD) were used for truncating extreme outliers before modeling and Bonferroni adjusted *P*-values were used to identify modeled outliers.

**Table S4.** *TP53* mutations identified by dilution match algorithm (DMA) and stereotypic error model (SEM). Only variants identified by both DMA and SEM were considered true mutations. \*Indicates newly diagnosed patients.

**Table S5.** *TP53* mutations excluded from analysis. Mutations predicted to encode functional p53 and silent mutations were excluded.

**Table S6.** Validation by droplet digital PCR. Probes for initial *TP53* findings validated all 33 tested mutations above the limit of detection (LOD) of the assay (0.2% VAF). Two mutations below the LOD were also validated, but not included in the final report. Note that 14 mutations in 7 non-diagnostic patients, who were neither sampled 0-200 days before treatment were also tested and validated.

**Table S7.** Patient characteristics in newly diagnosed patients stratified according to *TP53* (A) and IGHV status (B). *TP53* wild-type (TP53wt), *TP53* mutations without del(17p) (TP53mut), del(17p) regardless of *TP53* mutational status (Del(17p)), beta-2-microglobulin (B2M), fluorescent in situ hybridization (FISH).

**Table S8.** Patient characteristics at time of treatment stratified according to *TP53* (A) and IGHV status (B). *TP53* wild-type (TP53wt), *TP53* mutations without del(17p) (TP53mut), del(17p) regardless of *TP53* mutational status (Del(17p)), beta-2-microglobulin (B2M), fluorescent in situ hybridization (FISH).

| Case   | g description          | Undiluted VAF (%) | Diluted VAF (%) | aDR   | DG    | DFSO   |
|--------|------------------------|-------------------|-----------------|-------|-------|--------|
| Pilot1 | 17:7577536 T>C         | 11.40             | 2.38            | 0.209 | 0.216 | -0.007 |
| Pilot2 | 17:7577536 T>C         | 11.52             | 2.32            | 0.201 | 0.250 | -0.049 |
| Pilot3 | 17:7579446 T>G         | 0.31              | 0.07            | 0.226 | 0.161 | 0.065  |
| Pilot3 | 17:7579440~7579441 ->G | 0.29              | 0.05            | 0.189 | 0.161 | 0.028  |
| Pilot4 | 17:7578239 C>-         | 77.38             | 8.79            | 0.114 | 0.134 | -0.020 |
| Pilot5 | 17:7578203 C>G         | 11.01             | 1.15            | 0.104 | 0.113 | -0.009 |
| Pilot6 | 17:7578403 C>T         | 75.47             | 7.34            | 0.097 | 0.117 | -0.020 |
| Pilot7 | 17:7578205 C>A         | 39.71             | 8.77            | 0.221 | 0.252 | -0.031 |
| Pilot7 | 17:7578268 A>C         | 13.98             | 3.16            | 0.226 | 0.252 | -0.026 |

Table S1. Analysis of 8 del(17p) test samples with unknown *TP53* status. Nine *TP53* mutations were identified in the 7 of the 8 samples using the dilution match algorithm. Dilution grade (DG) and the adjusted dilution ratio (aDR) showed high correlation as seen by short distances from a slope of one (DFSO = DG - aDR).

| TP53    | Strand  | Oligo                 |
|---------|---------|-----------------------|
| Exon 2  | Forward | AGTGTCTCATGCTGGATCCC  |
| Exon 2  | Reverse | GTGGGCCTGCCCTTCCAATG  |
| Exon 3  | Forward | AGAGACCTGTGGGAAGCGAA  |
| Exon 3  | Reverse | CCCAGCCCAACCCTTGTCCCT |
| Exon 4a | Forward | CAGGGCAGCTACGGTTTCCG  |
| Exon 4a | Reverse | CTGACAGGAAGCCAAAGGGT  |
| Exon 4b | Forward | CCCAGAATGCCAGAGGCTGC  |
| Exon 4b | Reverse | AGTCACAGACTTGGCTGTCC  |
| Exon 4c | Forward | CCAGAATGCCAGAGGCTGCT  |
| Exon 4c | Reverse | GGGCAACTGACCGTGCAAGT  |
| Exon 4d | Forward | CTGAGGACCTGGTCATCTGA  |
| Exon 4d | Reverse | TGTAGGAGCTGCTGGTGCGAG |
| Exon 5a | Forward | CCCTGTGCAGCTGTGGGTTG  |
| Exon 5a | Reverse | CTGGGCAACCAGCCCTGTGC  |
| Exon 5b | Forward | TTGTGCCCTGACTTTCAACT  |
| Exon 5b | Reverse | GCTGTGACTGCTTGTAGATG  |
| Exon 6  | Forward | CAGGCCTCTGATTCCCTCACT |
| Exon 6  | Reverse | CTCCTCCCAGAGACCCCACT  |
| Exon 7  | Forward | ACTGGCCTCATCTTGGGCCT  |
| Exon 7  | Reverse | GCCAGTGTGCAGGGTGGCAA  |
| Exon 8a | Forward | GAACAGCTTTGAGGTGCGTG  |
| Exon 8a | Reverse | CGCTTCTTGTCTCTGCTTGCT |
| Exon 8b | Forward | CAGGTAGGACCTGATTTCCCT |
| Exon 8b | Reverse | CCTGGGGGCAGCTCGTGGTG  |
| Exon 9a | Forward | GCAGTTATGCCTCAGATTCA  |
| Exon 9a | Reverse | AACTTTCCACTTGATAAGAG  |
| Exon 9b | Forward | GCAGTTATGCCTCAGATTCA  |
| Exon 9b | Reverse | GATAAGAGGTCCCAAGACTT  |
| Exon 10 | Forward | TGAACCATCTTTTAACTCAG  |
| Exon 10 | Reverse | AGGAAGGGGCTGAGGTCACT  |

Table S2. The primers used for PCR amplification of *TP53* exons 2-10.

|                  |       | LOD      |       |       |       |          |       |       |       |        |       |       |       |       |       |       |
|------------------|-------|----------|-------|-------|-------|----------|-------|-------|-------|--------|-------|-------|-------|-------|-------|-------|
| P                | SD    | VAF≥0.2% |       |       |       | VAF≥0.3% |       |       |       | VAF≥1% |       |       |       |       |       |       |
| 10 <sup>-2</sup> | 2     | A        |       | DMA + | DMA - | Total    | B     |       | DMA + | DMA -  | Total | C     |       | DMA + | DMA - | Total |
|                  |       |          | SEM + | 94    | 22    | 116      |       | SEM + | 84    | 1      | 85    |       | SEM + | 52    | 0     | 52    |
|                  | SEM - |          | 4     | 386   | 390   | SEM -    |       | 3     | 127   | 130    | SEM - |       | 0     | 70    | 70    |       |
|                  | Total | 98       | 408   | 506   | Total | 87       | 128   | 215   | Total | 52     | 70    | 122   |       |       |       |       |
| 4                | D     |          | DMA + | DMA - | Total | E        |       | DMA + | DMA - | Total  | F     |       | DMA + | DMA - | Total |       |
|                  |       | SEM +    | 94    | 22    | 116   |          | SEM + | 84    | 1     | 85     |       | SEM + | 52    | 0     | 52    |       |
| SEM -            |       | 4        | 386   | 390   | SEM - |          | 3     | 127   | 130   | SEM -  |       | 0     | 70    | 70    |       |       |
| Total            | 98    | 408      | 506   | Total | 87    | 128      | 215   | Total | 52    | 70     | 122   |       |       |       |       |       |
| 10 <sup>-4</sup> | 2     | G        |       | DMA + | DMA - | Total    | H     |       | DMA + | DMA -  | Total | I     |       | DMA + | DMA - | Total |
|                  |       |          | SEM + | 94    | 22    | 116      |       | SEM + | 84    | 1      | 85    |       | SEM + | 52    | 0     | 52    |
|                  | SEM - |          | 4     | 386   | 390   | SEM -    |       | 3     | 127   | 130    | SEM - |       | 0     | 70    | 70    |       |
|                  | Total | 98       | 408   | 506   | Total | 87       | 128   | 215   | Total | 52     | 70    | 122   |       |       |       |       |
| 4                | J     |          | DMA + | DMA - | Total | K        |       | DMA + | DMA - | Total  | L     |       | DMA + | DMA - | Total |       |
|                  |       | SEM +    | 93    | 22    | 115   |          | SEM + | 83    | 1     | 84     |       | SEM + | 52    | 0     | 52    |       |
| SEM -            |       | 5        | 386   | 391   | SEM - |          | 4     | 127   | 131   | SEM -  |       | 0     | 70    | 70    |       |       |
| Total            | 98    | 408      | 506   | Total | 87    | 128      | 215   | Total | 52    | 70     | 122   |       |       |       |       |       |
| 10 <sup>-6</sup> | 2     | M        |       | DMA + | DMA - | Total    | N     |       | DMA + | DMA -  | Total | O     |       | DMA + | DMA - | Total |
|                  |       |          | SEM + | 93    | 22    | 115      |       | SEM + | 83    | 1      | 84    |       | SEM + | 52    | 0     | 52    |
|                  | SEM - |          | 5     | 386   | 391   | SEM -    |       | 4     | 127   | 131    | SEM - |       | 0     | 70    | 70    |       |
|                  | Total | 98       | 408   | 506   | Total | 87       | 128   | 215   | Total | 52     | 70    | 122   |       |       |       |       |
| 4                | P     |          | DMA + | DMA - | Total | Q        |       | DMA + | DMA - | Total  | R     |       | DMA + | DMA - | Total |       |
|                  |       | SEM +    | 91    | 22    | 113   |          | SEM + | 82    | 1     | 83     |       | SEM + | 52    | 0     | 52    |       |
| SEM -            |       | 7        | 386   | 393   | SEM - |          | 5     | 127   | 132   | SEM -  |       | 0     | 70    | 70    |       |       |
| Total            | 98    | 408      | 506   | Total | 87    | 128      | 215   | Total | 52    | 70     | 122   |       |       |       |       |       |

Table S3. Contingency tables

| Sample ID | c description  | p description | VAF (%) | Exon    | Effect      | Tool      | Validated  |
|-----------|----------------|---------------|---------|---------|-------------|-----------|------------|
| CLL6*     | c.848_849delGC | p.Arg283fs    | 0.36    | Exon 8  | frame shift | DMA       | Not tested |
| CLL14     | c.613T>A       | p.Tyr205Asn   | 0.22    | Exon 6  | missense    | SEM       | Not tested |
| CLL15*    | c.672+1G>A     | NA            | 97.45   | Exon 6  | splice      | SEM & DMA | Not tested |
| CLL18     | c.667C>A       | p.Pro223Thr   | 0.21    | Exon 6  | missense    | SEM       | Not tested |
| CLL20*    | c.667C>A       | p.Pro223Thr   | 0.29    | Exon 6  | missense    | SEM       | Not tested |
| CLL20*    | c.565G>T       | p.Ala189Ser   | 0.27    | Exon 6  | missense    | SEM       | Not tested |
| CLL21*    | c.832C>T       | p.Pro278Ser   | 0.44    | Exon 8  | missense    | SEM & DMA | ddPCR      |
| CLL21*    | c.667C>A       | p.Pro223Thr   | 0.29    | Exon 6  | missense    | SEM       | Not tested |
| CLL21*    | c.1086C>A      | p.Ser362Arg   | 0.26    | Exon 10 | missense    | SEM       | Not tested |
| CLL21*    | c.565G>T       | p.Ala189Ser   | 0.25    | Exon 6  | missense    | SEM       | Not tested |
| CLL22     | c.413C>T       | p.Ala138Val   | 5.34    | Exon 5  | missense    | SEM & DMA | Not tested |
| CLL22     | c.395A>G       | p.Lys132Arg   | 4.77    | Exon 5  | missense    | SEM & DMA | ddPCR      |
| CLL22     | c.767C>G       | p.Thr256Arg   | 2.81    | Exon 7  | missense    | SEM & DMA | Not tested |
| CLL22     | c.451C>T       | p.Pro151Ser   | 1.63    | Exon 5  | missense    | SEM & DMA | Not tested |
| CLL22     | c.742C>T       | p.Arg248Trp   | 1.47    | Exon 7  | missense    | SEM & DMA | ddPCR      |
| CLL22     | c.673-2A>T     | NA            | 1.05    | Exon 7  | splice      | SEM & DMA | Not tested |
| CLL22     | c.673-2A>G     | NA            | 0.99    | Exon 7  | splice      | SEM & DMA | Not tested |
| CLL22     | c.659A>G       | p.Tyr220Cys   | 0.94    | Exon 6  | missense    | SEM & DMA | ddPCR      |
| CLL22     | c.701A>G       | p.Tyr234Cys   | 0.91    | Exon 7  | missense    | SEM & DMA | ddPCR      |
| CLL22     | c.673-2A>C     | NA            | 0.87    | Exon 7  | splice      | SEM & DMA | Not tested |
| CLL22     | c.577C>G       | p.His193Asp   | 0.71    | Exon 6  | missense    | SEM & DMA | Not tested |
| CLL22     | c.736A>G       | p.Met246Val   | 0.49    | Exon 7  | missense    | SEM & DMA | Not tested |
| CLL22     | c.542G>A       | p.Arg181His   | 0.33    | Exon 5  | missense    | SEM & DMA | Not tested |
| CLL22     | c.783-2A>T     | NA            | 0.29    | Exon 8  | splice      | SEM       | Not tested |
| CLL22     | c.667C>A       | p.Pro223Thr   | 0.29    | Exon 6  | missense    | SEM       | Not tested |
| CLL22     | c.1086C>A      | p.Ser362Arg   | 0.28    | Exon 10 | missense    | SEM       | Not tested |
| CLL22     | c.565G>T       | p.Ala189Ser   | 0.28    | Exon 6  | missense    | SEM       | Not tested |
| CLL22     | c.560-2A>T     | NA            | 0.23    | Exon 6  | splice      | SEM & DMA | Not tested |
| CLL22     | c.404G>T       | p.Cys135Phe   | 0.22    | Exon 5  | missense    | SEM       | Not tested |
| CLL22     | c.577C>A       | p.His193Asn   | 0.20    | Exon 6  | missense    | SEM       | Not tested |
| CLL22     | c.395A>C       | p.Lys132Thr   | 0.20    | Exon 5  | missense    | SEM       | Not tested |
| CLL33*    | c.809T>C       | p.Phe270Ser   | 2.55    | Exon 8  | missense    | SEM & DMA | ddPCR      |
| CLL45*    | c.814G>A       | p.Val272Met   | 0.45    | Exon 8  | missense    | SEM & DMA | ddPCR      |
| CLL56*    | c.82G>T        | p.Glu28*      | 0.24    | Exon 3  | nonsense    | SEM       | Not tested |
| CLL65     | c.596G>T       | p.Gly199Val   | 2.95    | Exon 6  | missense    | SEM & DMA | ddPCR      |
| CLL65     | c.700T>A       | p.Tyr234Asn   | 0.41    | Exon 7  | missense    | SEM & DMA | ddPCR      |
| CLL74     | c.814G>A       | p.Val272Met   | 30.15   | Exon 8  | missense    | SEM & DMA | ddPCR      |
| CLL74     | c.239delC      | p.Pro80fs     | 10.79   | Exon 4  | frame shift | SEM & DMA | Not tested |
| CLL74     | c.488A>G       | p.Tyr163Cys   | 3.50    | Exon 5  | missense    | SEM & DMA | ddPCR      |
| CLL74     | c.332T>C       | p.Leu111Pro   | 3.14    | Exon 4  | missense    | SEM & DMA | Not tested |
| CLL74     | c.743G>A       | p.Arg248Gln   | 3.05    | Exon 7  | missense    | SEM & DMA | Not tested |
| CLL74     | c.838A>G       | p.Arg280Gly   | 2.24    | Exon 8  | missense    | SEM & DMA | Not tested |
| CLL74     | c.722C>G       | p.Ser241Cys   | 2.12    | Exon 7  | missense    | SEM & DMA | Not tested |
| CLL74     | c.524G>A       | p.Arg175His   | 1.98    | Exon 5  | missense    | SEM & DMA | Not tested |
| CLL74     | c.920-2A>G     | NA            | 1.90    | Exon 9  | splice      | SEM & DMA | Not tested |
| CLL74     | c.581T>G       | p.Leu194Arg   | 1.75    | Exon 6  | missense    | SEM & DMA | Not tested |
| CLL74     | c.993+2T>C     | NA            | 1.01    | Exon 9  | splice      | SEM & DMA | Not tested |
| CLL74     | c.818G>A       | p.Arg273His   | 0.78    | Exon 8  | missense    | SEM & DMA | Not tested |
| CLL74     | c.338T>G       | p.Phe113Cys   | 0.64    | Exon 4  | missense    | SEM       | Not tested |
| CLL74     | c.701A>G       | p.Tyr234Cys   | 0.52    | Exon 7  | missense    | SEM & DMA | ddPCR      |
| CLL74     | c.659A>G       | p.Tyr220Cys   | 0.48    | Exon 6  | missense    | SEM & DMA | Not tested |
| CLL74     | c.830G>A       | p.Cys277Tyr   | 0.47    | Exon 8  | missense    | SEM & DMA | Not tested |
| CLL74     | c.272G>A       | p.Trp91*      | 0.45    | Exon 4  | nonsense    | SEM & DMA | Not tested |
| CLL74     | c.413C>T       | p.Ala138Val   | 0.38    | Exon 5  | missense    | SEM & DMA | Not tested |
| CLL74     | c.536A>G       | p.His179Arg   | 0.27    | Exon 5  | missense    | SEM & DMA | Not tested |
| CLL74     | c.395A>G       | p.Lys132Arg   | 0.27    | Exon 5  | missense    | SEM & DMA | ddPCR      |

(continued)

| Sample ID | c description  | p description | VAF (%) | Exon   | Effect      | Tool      | Validated               |
|-----------|----------------|---------------|---------|--------|-------------|-----------|-------------------------|
| CLL74     | c.673-2A>T     | NA            | 0.21    | Exon 7 | splice      | SEM       | Not tested              |
| CLL77*    | c.844C>G       | p.Arg282Gly   | 0.26    | Exon 8 | missense    | SEM & DMA | Not tested              |
| CLL94*    | c.745A>G       | p.Arg249Gly   | 11.06   | Exon 7 | missense    | SEM & DMA | Capture                 |
| CLL98*    | c.472C>G       | p.Arg158Gly   | 6.32    | Exon 5 | missense    | SEM & DMA | ddPCR & Capture         |
| CLL104*   | c.742C>T       | p.Arg248Trp   | 0.29    | Exon 7 | missense    | SEM & DMA | ddPCR                   |
| CLL107*   | c.388C>T       | p.Leu130Phe   | 0.21    | Exon 5 | missense    | SEM & DMA | Not tested              |
| CLL109*   | c.902delC      | p.Pro301fs    | 0.24    | Exon 8 | frame shift | SEM       | Not tested              |
| CLL111*   | c.823T>C       | p.Cys275Arg   | 0.58    | Exon 8 | missense    | SEM & DMA | Not tested              |
| CLL112*   | c.524G>A       | p.Arg175His   | 48.92   | Exon 5 | missense    | SEM & DMA | Capture                 |
| CLL116*   | c.716A>G       | p.Asn239Ser   | 11.86   | Exon 7 | missense    | SEM & DMA | Capture                 |
| CLL120*   | c.736A>G       | p.Met246Val   | 18.24   | Exon 7 | missense    | SEM & DMA | Capture                 |
| CLL120*   | c.527G>T       | p.Cys176Phe   | 0.20    | Exon 5 | missense    | SEM & DMA | Not tested              |
| CLL135*   | c.610delG      | p.Glu204fs    | 77.27   | Exon 6 | frame shift | SEM & DMA | Capture                 |
| CLL137    | c.530C>T       | p.Pro177Leu   | 2.25    | Exon 5 | missense    | SEM & DMA | Not tested              |
| CLL139*   | c.726C>G       | p.Cys242Trp   | 0.66    | Exon 7 | missense    | SEM & DMA | Not tested              |
| CLL144*   | c.734G>A       | p.Gly245Asp   | 79.37   | Exon 7 | missense    | SEM & DMA | Capture                 |
| CLL144*   | c.536A>T       | p.His179Leu   | 1.22    | Exon 5 | missense    | SEM & DMA | Not validated (Capture) |
| CLL145*   | c.848_849delGC | p.Arg283fs    | 0.45    | Exon 8 | frame shift | DMA       | Not tested              |
| CLL146*   | c.848_849delGC | p.Arg283fs    | 0.34    | Exon 8 | frame shift | DMA       | Not tested              |
| CLL150*   | c.626_627delGA | p.Arg209fs    | 40.10   | Exon 6 | frame shift | SEM & DMA | ddPCR & Capture         |
| CLL161    | c.376-1G>A     | NA            | 4.50    | Exon 5 | splice      | SEM & DMA | Not tested              |
| CLL165*   | c.309C>G       | p.Tyr103*     | 1.94    | Exon 4 | nonsense    | SEM & DMA | Capture                 |
| CLL177*   | c.830G>A       | p.Cys277Tyr   | 2.19    | Exon 8 | missense    | SEM & DMA | Capture                 |
| CLL179*   | c.524G>A       | p.Arg175His   | 0.45    | Exon 5 | missense    | SEM & DMA | Not tested              |
| CLL187*   | c.318C>G       | p.Ser106Arg   | 2.87    | Exon 4 | missense    | SEM & DMA | Capture                 |
| CLL191*   | c.438G>A       | p.Trp146*     | 26.41   | Exon 5 | nonsense    | SEM & DMA | Capture                 |
| CLL193    | c.439_440insG  | p.Val147fs    | 41.24   | Exon 5 | frame shift | SEM & DMA | Not tested              |
| CLL193    | c.733G>A       | p.Gly245Ser   | 29.85   | Exon 7 | missense    | SEM & DMA | Not tested              |
| CLL193    | c.481G>A       | p.Ala161Thr   | 0.29    | Exon 5 | missense    | SEM       | Not tested              |
| CLL193    | c.488A>G       | p.Tyr163Cys   | 0.23    | Exon 5 | missense    | DMA       | Not tested              |
| CLL193    | c.128T>A       | p.Leu43*      | 0.21    | Exon 4 | nonsense    | SEM & DMA | Not tested              |
| CLL223*   | c.644G>T       | p.Ser215Ile   | 40.75   | Exon 6 | missense    | SEM & DMA | Capture                 |
| CLL223*   | c.581T>G       | p.Leu194Arg   | 13.62   | Exon 6 | missense    | SEM & DMA | Capture                 |
| CLL233*   | c.772G>A       | p.Glu258Lys   | 0.49    | Exon 7 | missense    | SEM & DMA | Not tested              |
| CLL250*   | c.572_573insCC | p.Gln192fs    | 0.48    | Exon 6 | frame shift | SEM & DMA | Not tested              |
| CLL251*   | c.869G>A       | p.Arg290His   | 50.49   | Exon 8 | missense    | SEM & DMA | Capture                 |
| CLL258*   | c.848G>C       | p.Arg283Pro   | 0.27    | Exon 8 | missense    | SEM & DMA | Not tested              |
| CLL261*   | c.455_456insT  | p.Pro153fs    | 0.36    | Exon 5 | frame shift | SEM & DMA | Not tested              |
| CLL269*   | c.440T>G       | p.Val147Gly   | 33.23   | Exon 5 | missense    | SEM & DMA | Capture                 |
| CLL275*   | c.524G>A       | p.Arg175His   | 3.02    | Exon 5 | missense    | SEM & DMA | Not tested              |
| CLL288*   | c.581T>G       | p.Leu194Arg   | 59.85   | Exon 6 | missense    | SEM & DMA | Capture                 |
| CLL294*   | c.577C>T       | p.His193Tyr   | 27.33   | Exon 6 | missense    | SEM & DMA | Capture                 |
| CLL299*   | c.388C>T       | p.Leu130Phe   | 0.94    | Exon 5 | missense    | SEM & DMA | Not tested              |
| CLL302*   | c.314G>A       | p.Gly105Asp   | 0.31    | Exon 4 | missense    | SEM & DMA | Not tested              |
| CLL310*   | c.482C>A       | p.Ala161Asp   | 20.83   | Exon 5 | missense    | SEM & DMA | Capture                 |
| CLL310*   | c.626_627delGA | p.Arg209fs    | 13.80   | Exon 6 | frame shift | SEM & DMA | ddPCR & Capture         |
| CLL325*   | c.737T>G       | p.Met246Arg   | 8.84    | Exon 7 | missense    | SEM & DMA | Capture                 |
| CLL327*   | c.830G>T       | p.Cys277Phe   | 3.92    | Exon 8 | missense    | SEM & DMA | Capture                 |
| CLL328    | c.469G>T       | p.Val157Phe   | 79.62   | Exon 5 | missense    | SEM & DMA | Not tested              |
| CLL328    | c.764delT      | p.Ile255fs    | 0.43    | Exon 7 | frame shift | SEM & DMA | Not tested              |
| CLL328    | c.529C>A       | p.Pro177Thr   | 0.42    | Exon 5 | missense    | SEM & DMA | Not tested              |
| CLL328    | c.645T>G       | p.Ser215Arg   | 0.37    | Exon 6 | missense    | SEM & DMA | Not tested              |
| CLL328    | c.993+1G>A     | NA            | 0.30    | Exon 9 | splice      | SEM & DMA | Not tested              |
| CLL342*   | c.626_627delGA | p.Arg209fs    | 1.60    | Exon 6 | frame shift | SEM & DMA | ddPCR & Capture         |
| CLL342*   | c.722C>T       | p.Ser241Phe   | 0.42    | Exon 7 | missense    | SEM & DMA | Not tested              |
| CLL346*   | c.742C>G       | p.Arg248Gly   | 2.94    | Exon 7 | missense    | SEM & DMA | Not validated (Capture) |

(continued)

| Sample ID | c description | p description | VAF (%) | Exon   | Effect   | Tool      | Validated  |
|-----------|---------------|---------------|---------|--------|----------|-----------|------------|
| CLL346*   | c.743G>A      | p.Arg248Gln   | 0.93    | Exon 7 | missense | SEM & DMA | Capture    |
| CLL346*   | c.641A>G      | p.His214Arg   | 0.41    | Exon 6 | missense | SEM & DMA | Not tested |
| CLL348*   | c.430C>T      | p.Gln144*     | 0.29    | Exon 5 | nonsense | SEM       | Not tested |
| CLL348*   | c.482C>T      | p.Ala161Val   | 0.27    | Exon 5 | missense | SEM       | Not tested |
| CLL350*   | c.523C>T      | p.Arg175Cys   | 14.10   | Exon 5 | missense | SEM & DMA | Capture    |
| CLL350*   | c.919+1G>T    | NA            | 0.24    | Exon 8 | splice   | SEM & DMA | Not tested |
| CLL358*   | c.824G>A      | p.Cys275Tyr   | 0.41    | Exon 8 | missense | SEM & DMA | Not tested |
| CLL358*   | c.80C>A       | p.Pro27His    | 0.22    | Exon 3 | missense | SEM       | Not tested |

Table S4. *TP53* mutations identified in full study cohort (n=308) using the dilution match algorithm (DMA) and stereotypic error model (SEM). Only variants identified by both DMA and SEM were considered true mutations. \*Indicates newly diagnosed patients.

| Sample ID | c description | p description | VAF (%) | Exon    | Exclusion criterion     |
|-----------|---------------|---------------|---------|---------|-------------------------|
| CLL47     | c.704A>G      | p.Asn235Ser   | 49.18   | Exon 7  | Encoding functional p53 |
| CLL61     | c.672G>A      | p.Glu224Glu   | 0.69    | Exon 6  | Silent mutation         |
| CLL93     | c.114A>C      | p.Gln38His    | 0.21    | Exon 4  | Encoding functional p53 |
| CLL122    | c.826G>A      | p.Ala276Thr   | 2.54    | Exon 8  | Encoding functional p53 |
| CLL140    | c.1060C>A     | p.Gln354Lys   | 52.51   | Exon 10 | Encoding functional p53 |
| CLL214    | c.704A>G      | p.Asn235Ser   | 48.96   | Exon 7  | Encoding functional p53 |
| CLL239    | c.410T>C      | p.Leu137Pro   | 1.04    | Exon 5  | Encoding functional p53 |
| CLL247    | c.837G>A      | p.Gly279Gly   | 1.43    | Exon 8  | Silent mutation         |
| CLL250    | c.570T>C      | p.Pro190Pro   | 0.52    | Exon 6  | Silent mutation         |
| CLL267    | c.1015G>A     | p.Glu339Lys   | 49.56   | Exon 10 | Encoding functional p53 |
| CLL329    | c.612G>A      | p.Glu204Glu   | 50.05   | Exon 6  | Silent mutation         |

Table S5. *TP53* mutations excluded from analysis. Mutations predicted to encode functional p53 and silent mutations were excluded.

| Sample ID | Assay      | VAF by ddPCR (%) | VAF by NGS (%) | H2O Control (%) | Cohort                      |
|-----------|------------|------------------|----------------|-----------------|-----------------------------|
| CLL21     | P278S      | 0.33             | 0.44           | 0.00            | Newly diagnosed             |
| CLL33     | F270S      | 2.34             | 2.55           | 0.00            | Newly diagnosed             |
| CLL45     | V272M      | 0.23             | 0.45           | 0.00            | Newly diagnosed             |
| CLL98     | R158G      | 6.63             | 6.32           | 0.00            | Newly diagnosed             |
| CLL104    | R248W      | 0.46             | 0.29           | 0.00            | Newly diagnosed             |
| CLL150    | R209Kfs*6  | 40.94            | 40.10          | 0.00            | Newly diagnosed             |
| CLL148    | R209Kfs*6  | 0.22             | 0.15           | 0.00            | Newly diagnosed             |
| CLL310    | R209Kfs*6  | 14.38            | 13.80          | 0.00            | Newly diagnosed             |
| CLL315    | R209Kfs*6  | 0.08             | 0.13           | 0.00            | Newly diagnosed             |
| CLL342    | R209Kfs*6  | 1.67             | 1.60           | 0.00            | Newly diagnosed             |
| CLL22     | Y220C      | 0.90             | 0.94           | 0.00            | At time of treatment        |
| CLL22     | K132R      | 6.22             | 4.77           | 0.00            | At time of treatment        |
| CLL22     | R248W      | 1.36             | 1.47           | 0.00            | At time of treatment        |
| CLL22     | Y234C      | 1.01             | 0.91           | 0.00            | At time of treatment        |
| CLL65     | G199V      | 3.26             | 2.95           | 0.00            | At time of treatment        |
| CLL65     | Y234N      | 0.37             | 0.41           | 0.00            | At time of treatment        |
| CLL74     | Y163C      | 3.28             | 3.50           | 0.00            | At time of treatment        |
| CLL74     | V272M      | 32.32            | 30.15          | 0.06            | At time of treatment        |
| CLL74     | Y234C      | 0.48             | 0.52           | 0.00            | At time of treatment        |
| CLL74     | K132R      | 0.40             | 0.27           | 0.00            | At time of treatment        |
| CLL193    | Y163C      | 0.14             | 0.23           | 0.00            | At time of treatment        |
| CLL4      | Q331*      | 5.41             | 4.90           | 0.00            | Non-diagnostic, not treated |
| CLL4      | R209Kfs*6  | 2.07             | 1.82           | 0.00            | Non-diagnostic, not treated |
| CLL10     | P316Sfs*21 | 0.23             | 0.20           | 0.00            | Non-diagnostic, not treated |
| CLL26     | C135F      | 4.48             | 4.20           | 0.00            | Non-diagnostic, not treated |
| CLL40     | Y163C      | 0.45             | 0.53           | 0.00            | Non-diagnostic, not treated |
| CLL40     | K132R      | 0.39             | 0.35           | 0.00            | Non-diagnostic, not treated |
| CLL40     | R248W      | 0.32             | 0.29           | 0.00            | Non-diagnostic, not treated |
| CLL40     | Y234C      | 1.46             | 1.20           | 0.00            | Non-diagnostic, not treated |
| CLL67     | I195T      | 0.35             | 0.36           | 0.00            | Non-diagnostic, not treated |
| CLL134    | R248W      | 1.36             | 0.90           | 0.00            | Non-diagnostic, not treated |
| CLL134    | I195T      | 0.67             | 0.45           | 0.00            | Non-diagnostic, not treated |
| CLL134    | Y234C      | 0.43             | 0.34           | 0.00            | Non-diagnostic, not treated |
| CLL186    | R248W      | 0.41             | 0.44           | 0.00            | Non-diagnostic, not treated |
| CLL186    | Y234C      | 2.54             | 2.61           | 0.00            | Non-diagnostic, not treated |

Table S6. Droplet digital PCR (ddPCR) probes for initial *TP53* findings validated all 33 tested mutations above the threshold of 0.2% VAF. Two mutations below the VAF threshold of 0.2% were also validated, but not included in the final report. Note that 14 mutations in 7 non-diagnostic patients not sampled before 200 days of treatment were also tested and validated.

A) Patient characteristics according to TP53 mutational status in newly diagnosed patients

| Variable |              | TP53wt (N=249) | TP53 mutated (N=41) |                  |                |
|----------|--------------|----------------|---------------------|------------------|----------------|
|          |              |                | VAF<1%, N (%)       | VAF 1-10%, N (%) | VAF>10%, N (%) |
| Age      | <65 years    | 111 (44.6)     | 2 (13.3)            | 2 (20.0)         | 5 (31.2)       |
|          | >65 years    | 138 (55.4)     | 13 (86.7)           | 8 (80.0)         | 11 (68.8)      |
| Binet    | A            | 203 (85.7)     | 12 (92.3)           | 8 (88.9)         | 9 (60.0)       |
|          | B/C          | 34 (14.3)      | 1 (7.7)             | 1 (11.1)         | 6 (40.0)       |
|          | Unknown      | 12             | 2                   | 1                | 1              |
| B2M      | <4.0 mg/L    | 184 (87.6)     | 12 (100.0)          | 7 (77.8)         | 10 (66.7)      |
|          | >4.0 mg/L    | 26 (12.4)      | 0 (0.0)             | 2 (22.2)         | 5 (33.3)       |
|          | Unknown      | 39             | 3                   | 1                | 1              |
| IGHV     | Mutated      | 170 (69.1)     | 12 (80.0)           | 4 (44.4)         | 9 (56.2)       |
|          | Unmutated    | 76 (30.9)      | 3 (20.0)            | 5 (55.6)         | 7 (43.8)       |
|          | Inconclusive | 3              | 0                   | 1                | 0              |
| FISH     | No del(17p)  | 248 (99.6)     | 15 (100.0)          | 10 (100.0)       | 10 (62.5)      |
|          | Del(17p)     | 1 (0.4)        | 0 (0.0)             | 0 (0.0)          | 6 (37.5)       |

B) Patient characteristics according to IGHV mutational status in newly diagnosed patients

| Variable    |               | IGHV mutational status (N=290) |                  |                     |
|-------------|---------------|--------------------------------|------------------|---------------------|
|             |               | Mutated, N (%)                 | Unmutated, N (%) | Inconclusive, N (%) |
| Age         | >65 years     | 74 (38.5)                      | 43 (47.8)        | 3 (37.5)            |
|             | <65 years     | 118 (61.5)                     | 47 (52.2)        | 5 (62.5)            |
| Binet       | A             | 166 (91.2)                     | 59 (70.2)        | 7 (87.5)            |
|             | B/C           | 16 (8.8)                       | 25 (29.8)        | 1 (12.5)            |
|             | Unknown       | 10                             | 6                | 0                   |
| B2M         | <4.0 mg/L     | 148 (89.7)                     | 58 (78.4)        | 7 (100.0)           |
|             | >4.0 mg/L     | 17 (10.3)                      | 16 (21.6)        | 0 (0.0)             |
|             | Unknown       | 27                             | 16               | 1                   |
| TP53 status | TP53wt        | 166 (86.5)                     | 75 (83.3)        | 7 (87.5)            |
|             | TP53mut <1%   | 12 (6.2)                       | 3 (3.3)          | 0 (0.0)             |
|             | TP53mut 1-10% | 4 (2.1)                        | 5 (5.6)          | 1 (12.5)            |
|             | TP53mut >10%  | 6 (3.1)                        | 4 (4.4)          | 0 (0.0)             |
|             | Del(17p)      | 4 (2.1)                        | 3 (3.3)          | 0 (0.0)             |

Table S7. Patient characteristics in newly diagnosed patients stratified according to *TP53* (A) and IGHV mutational status (B). *TP53* wild-type (TP53wt), *TP53* mutation without del(17p) (TP53mut), del(17p) regardless of TP53 mutational status (Del(17p)), beta-2-microglobulin (B2M), fluorescent in situ hybridization (FISH).

A) Patient characteristics according to TP53 mutational status at time of treatment

| Variable |              | TP53wt (N=44) | TP53 mutated (N=17) |                  |                |
|----------|--------------|---------------|---------------------|------------------|----------------|
|          |              |               | VAF<1%, N (%)       | VAF 1-10%, N (%) | VAF>10%, N (%) |
| Age      | <65 years    | 27 (61.4)     | 1 (25.0)            | 3 (50.0)         | 4 (57.1)       |
|          | >65 years    | 17 (38.6)     | 3 (75.0)            | 3 (50.0)         | 3 (42.9)       |
| Binet    | A            | 13 (29.5)     | 3 (75.0)            | 2 (33.3)         | 2 (28.6)       |
|          | B/C          | 31 (70.5)     | 1 (25.0)            | 4 (66.7)         | 5 (71.4)       |
| B2M      | <4.0 mg/L    | 21 (77.8)     | 4 (100.0)           | 1 (50.0)         | 1 (25.0)       |
|          | >4.0 mg/L    | 6 (22.2)      | 0 (0.0)             | 1 (50.0)         | 3 (75.0)       |
|          | Unknown      | 17            | 0                   | 4                | 3              |
| IGHV     | Mutated      | 15 (36.6)     | 1 (25.0)            | 1 (20.0)         | 0 (0.0)        |
|          | Unmutated    | 26 (63.4)     | 3 (75.0)            | 4 (80.0)         | 7 (100.0)      |
|          | Inconclusive | 3             | 0                   | 1                | 0              |
| FISH     | No del(17p)  | 43 (97.7)     | 4 (100.0)           | 5 (83.3)         | 3 (42.9)       |
|          | Del(17p)     | 1 (2.3)       | 0 (0.0)             | 1 (16.7)         | 4 (57.1)       |

B) Patient characteristics according to IGHV mutational status at time of treatment

| Variable    |               | IGHV mutational status (N = 61) |                  |                     |
|-------------|---------------|---------------------------------|------------------|---------------------|
|             |               | Mutated, N (%)                  | Unmutated, N (%) | Inconclusive, N (%) |
| Age         | >65 years     | 8 (44.4)                        | 27 (64.3)        | 4 (66.7)            |
|             | <65 years     | 10 (55.6)                       | 15 (35.7)        | 2 (33.3)            |
| Binet       | A             | 6 (37.5)                        | 13 (37.1)        | 3 (60.0)            |
|             | B/C           | 10 (62.5)                       | 22 (62.9)        | 2 (40.0)            |
|             | Unknown       | 2                               | 7                | 1                   |
| B2M         | <4.0 mg/L     | 9 (75.0)                        | 16 (69.6)        | 2 (100.0)           |
|             | >4.0 mg/L     | 3 (25.0)                        | 7 (30.4)         | 0 (0.0)             |
|             | Unknown       | 6                               | 19               | 4                   |
| TP53 status | TP53wt        | 16 (88.9)                       | 25 (59.5)        | 4 (66.7)            |
|             | TP53mut <1%   | 1 (5.6)                         | 3 (7.1)          | 0 (0.0)             |
|             | TP53mut 1-10% | 1 (5.6)                         | 5 (11.9)         | 1 (16.7)            |
|             | TP53mut >10%  | 0 (0.0)                         | 3 (7.1)          | 0 (0.0)             |
|             | Del(17p)      | 0 (0.0)                         | 6 (14.3)         | 1 (16.7)            |

Table S8. Patient characteristics at time of treatment stratified according to *TP53* (A) and IGHV mutational status (B). *TP53* wild-type (TP53wt), *TP53* mutation without del(17p) (TP53mut), del(17p) regardless of *TP53* mutational status (Del(17p)), beta-2-microglobulin (B2M), fluorescent in situ hybridization (FISH).

## Supplemental figure legends

**Figure S1. Consort diagram of patients included in the study.** Newly diagnosed patients and patients sampled at time of treatment were collected within 200 days of a diagnostic flow cytometry and up to 200 days before treatment, respectively.

**Figure S2. Establishing the limit of detection and range of dilution grade.** (A) By serial 10-fold dilutions of four Sanger validated *TP53* mutations, all four mutations could be detected down to an adjusted variant allele frequency (VAF) of 0.016% (unadjusted 0.023% VAF). Variants were not detected at the lowest dilution level in two samples expected to fall below a VAF of 0.01%. A previously unknown low burden mutation was also identified (CLL617 g.17:7578394 T>A). (B) To test the range of the dilution step and indel detection capability, four Sanger validated *TP53* indels were initially diluted to low burden levels (1:10) and subsequently diluted 1:3 and 1:10.

**Figure S3. Determining a dilution match.** (A) Scatter plot of dilution grades (DGs) and adjusted dilution ratios (aDRs) for variants identified in both undiluted and diluted samples from the same patient. The DGs and aDRs were expected to match a line with a slope of one (solid line), however a cluster of aDRs with distances from a slope of one (DFSO) above 0.5 (thin line) was also identified. Notice the distribution of DGs in tilted box plot (top). (B) Histogram of DFSO for all variants identified in both undiluted and diluted samples from the same patient. The 99.9% reference range (striped lines) for variants with a DFSO less than 0.5 (solid line) determined a dilution match in which variants were considered true mutations. The threshold was trimmed to an absolute DFSO of 0.16 (dotted lines) based on the 99.9% reference range.

**Figure S4. Modeling stereotypic errors.** (A) The distribution of single nucleotide variants (SNV) showed enrichment of errors for C:G>A:T as well as C:G deletions. (B) For each position specific nucleotide change (e.g. g.17:7578406C>T) called 20 times or more, the distribution of variant allele frequencies (VAF) could be modeled to fit gamma distributions (red curve). (C) SNVs with less than 20 position specific occurrences showed a more even distribution of A, T, C, and G with very few deletions left to model. (D) Regardless of the genomic position, low occurring position specific variants (<20) were pooled according to their unique nucleotide change (e.g. A>G) and VAFs were modeled using best fitted gamma distribution. Variants above the overall (red line) and modeled limits of detection (striped red line) were called as true mutations.

**Figure S5. Limit of detection for stereotypic error model.** Multiple boxplot exemplifying the stereotypic error modeling (SEM). (A) Displaying only the first 100 bp 5' of *TP53* exon 4, the limits of detection (LODs) for position specific nucleotide change allowed variant calls at various thresholds (dotted line) according to the hg19 position and nucleotide change. Variants below Bonferroni corrected LODs (horizontal bars) and overall LOD (i.e. VAF <0.2%) were excluded (open circle), while variants above both modeled and overall LODs were called as true mutations (solid circle). Outliers above the modeled LODs but below the overall LOD indicated (open triangle). (B) For unique nucleotide changes (only SNVs are shown), box plots demonstrate that all modeled LODs (horizontal bar) are below the overall LOD (red line).

**Figure S6. Schematic workflow of bioinformatic pipeline.** The combined variant call format (VCF) files from a low frequency detection tool and a basic detection tool in CLC Genomics Workbench (Qiagen) was analyzed in R using both a dilution match algorithm (DMA) and a

stereotypic error model (SEM). For DMA, the number of total variants is indicated (N), while the number of unique variants (N) and number of unique variants modeled (n) is indicated for SEM. Variants were further cross referenced in the IARC *TP53* database. Only true positive mutations from DMA and SEM were included in the final call.

**Figure S7. Stereotypic error distribution of problematic variants.** (A) g.17:7577090C>T (p.Arg283His) showed a distribution with a wide right tail. Stereotypic error modeling (SEM) identified 45 false positive mutations for this variant between 0.2-0.65% VAF. (B) At the same position, g.17:7577089\_7577090GC>- (p.Arg283fs\*22) was called in three patients using the dilution match algorithm (DMA), but excluded using SEM. (C) With only 24 observations, SEM excluded a ddPCR validated g.17:7578442T>C (p.Tyr163Cys) with VAF of 0.23% (red arrow) that was called by the dilution match algorithm (DMA). (D) g.17:77579837A>C (c.74+2T>G) splicing site mutation shows a multimodal distribution unfit for modeling. This variant was called by CLC in 116 undiluted samples with a VAF up to 1.7% but was excluded by both DMA and SEM. Best fitted gamma distribution (red curves), modeled position specific limit of detection (LOD; dotted red line), and overall LOD of 0.2% VAF (red line).

**Figure S8. Subanalysis of overall and treatment-free survival in newly diagnosed patients.** Kaplan Meier curves comparing (A-B) overall (OS) and (C-D) treatment-free survival (TFS) based on *TP53* status. Patients with *TP53*mut 1-10% VAF and *TP53*ab >10% VAF shown separately (A, C). Patients with *TP53*mut 1-10% VAF and *TP53*mut >10% VAF shown separately (B, D). Significant difference in TFS between *TP53*ab >10% VAF and *TP53* wild-type (*TP53*wt) was demonstrated. *P*-values indicated in tables.

Figure S1.

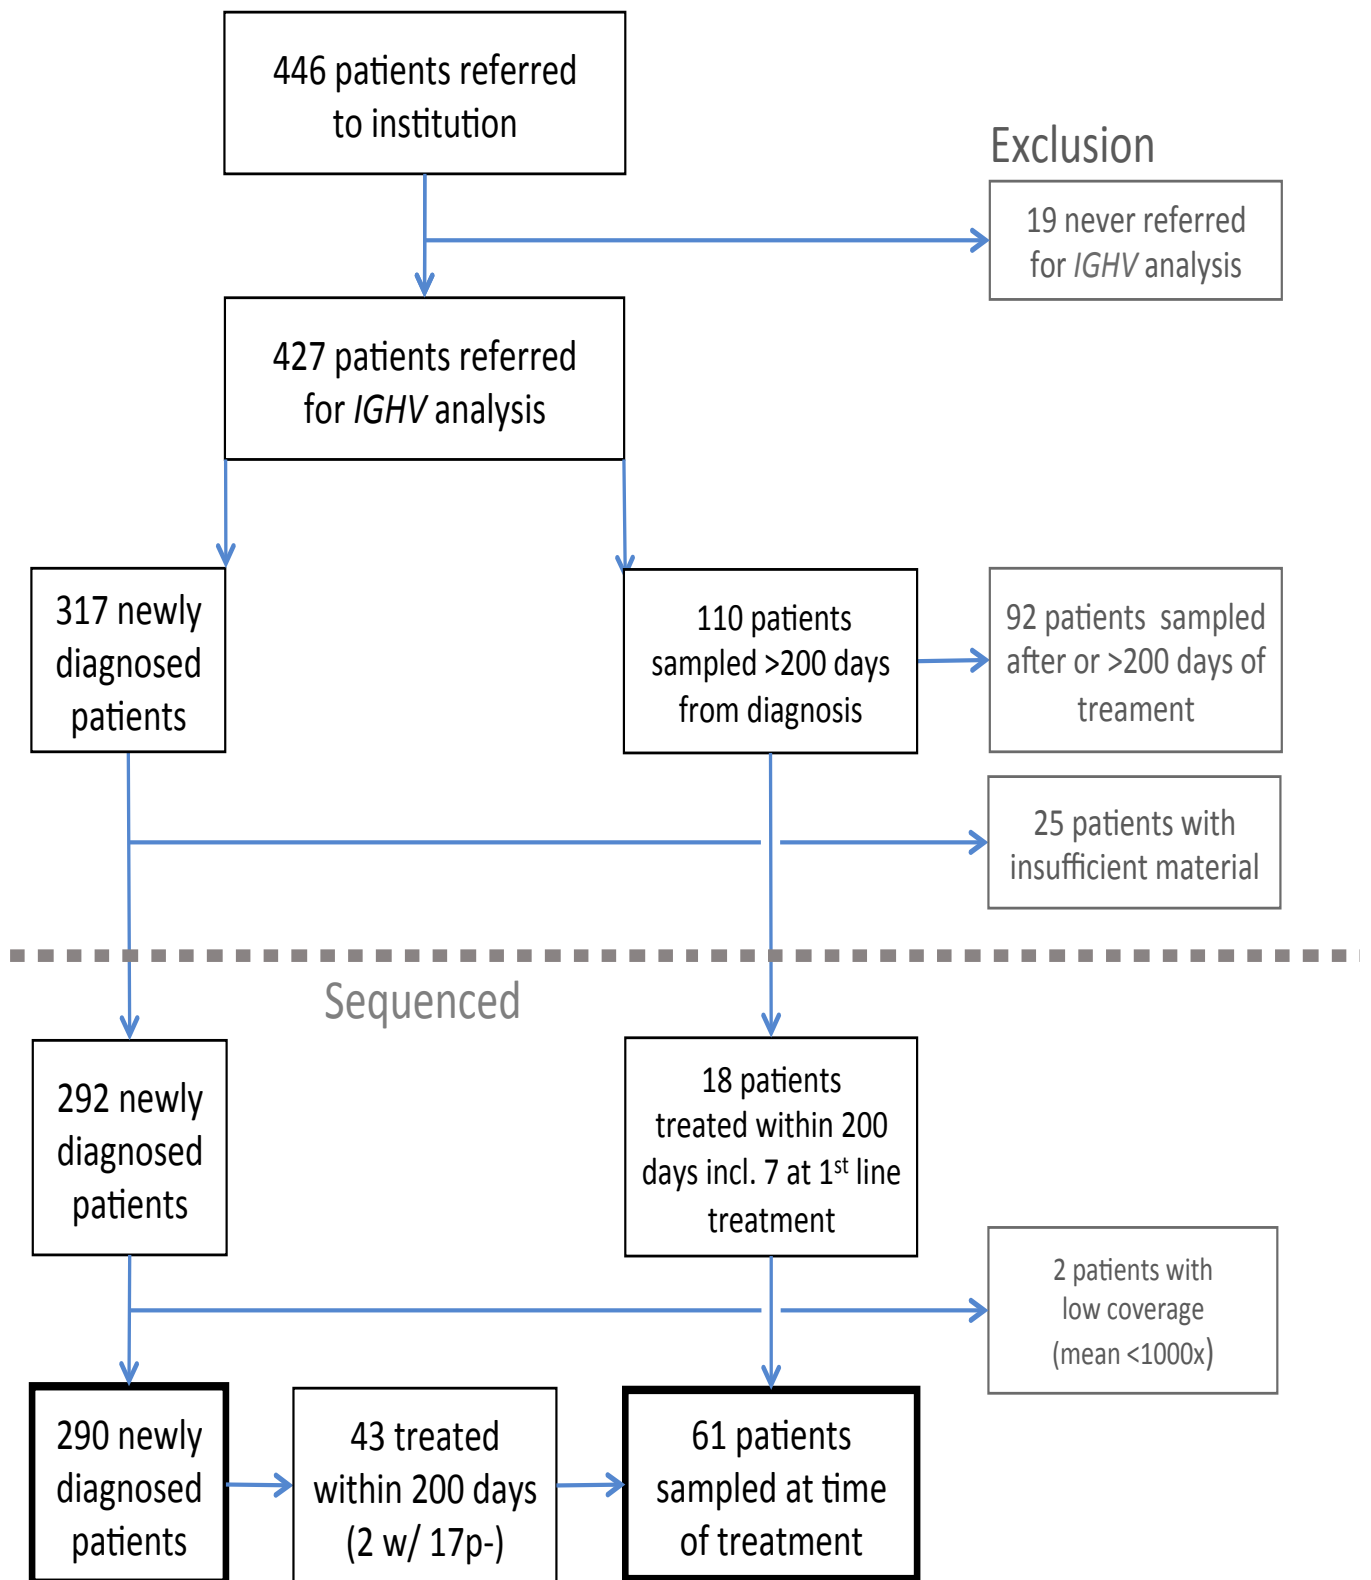

Figure S2.

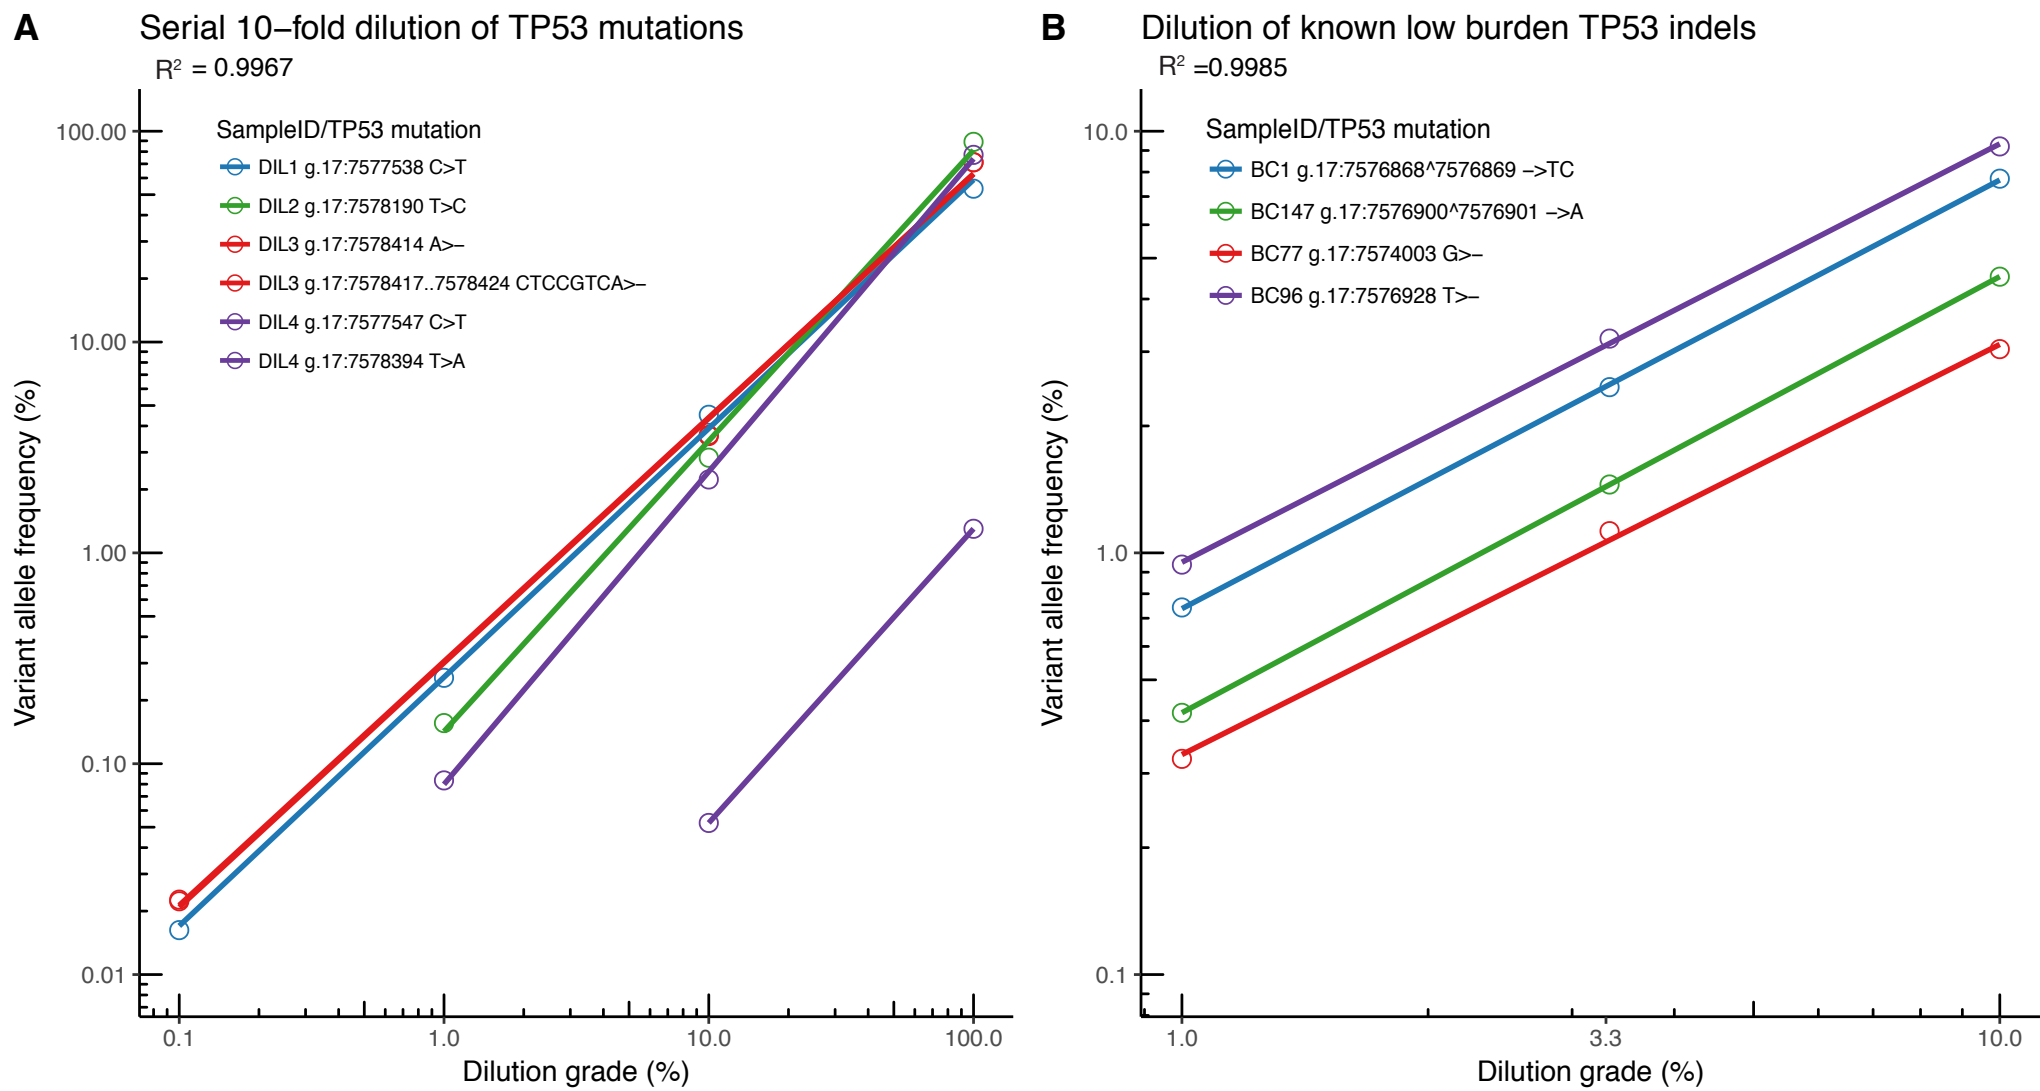

Figure S3.

A

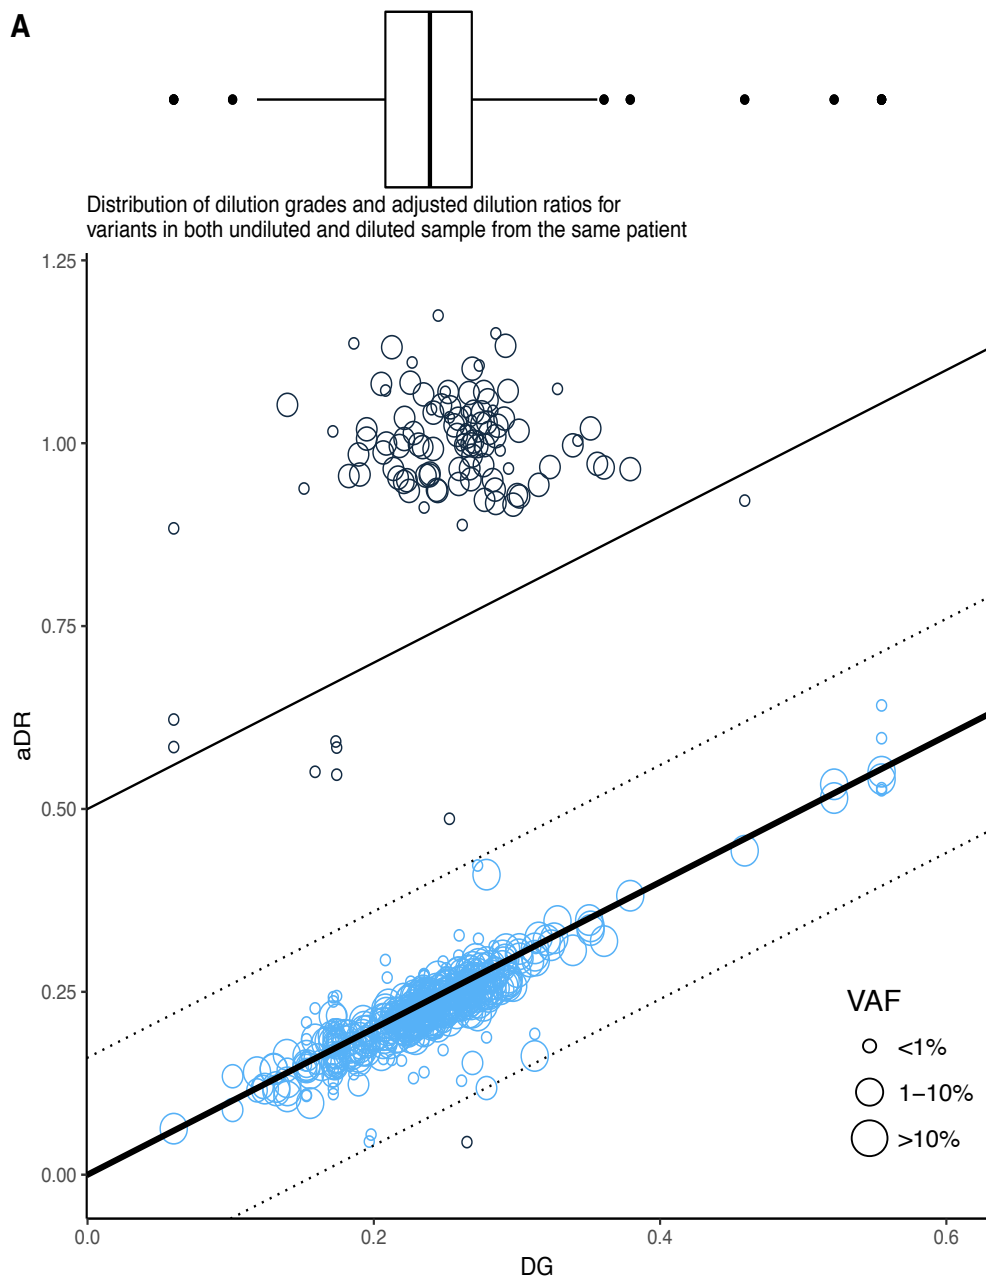

B

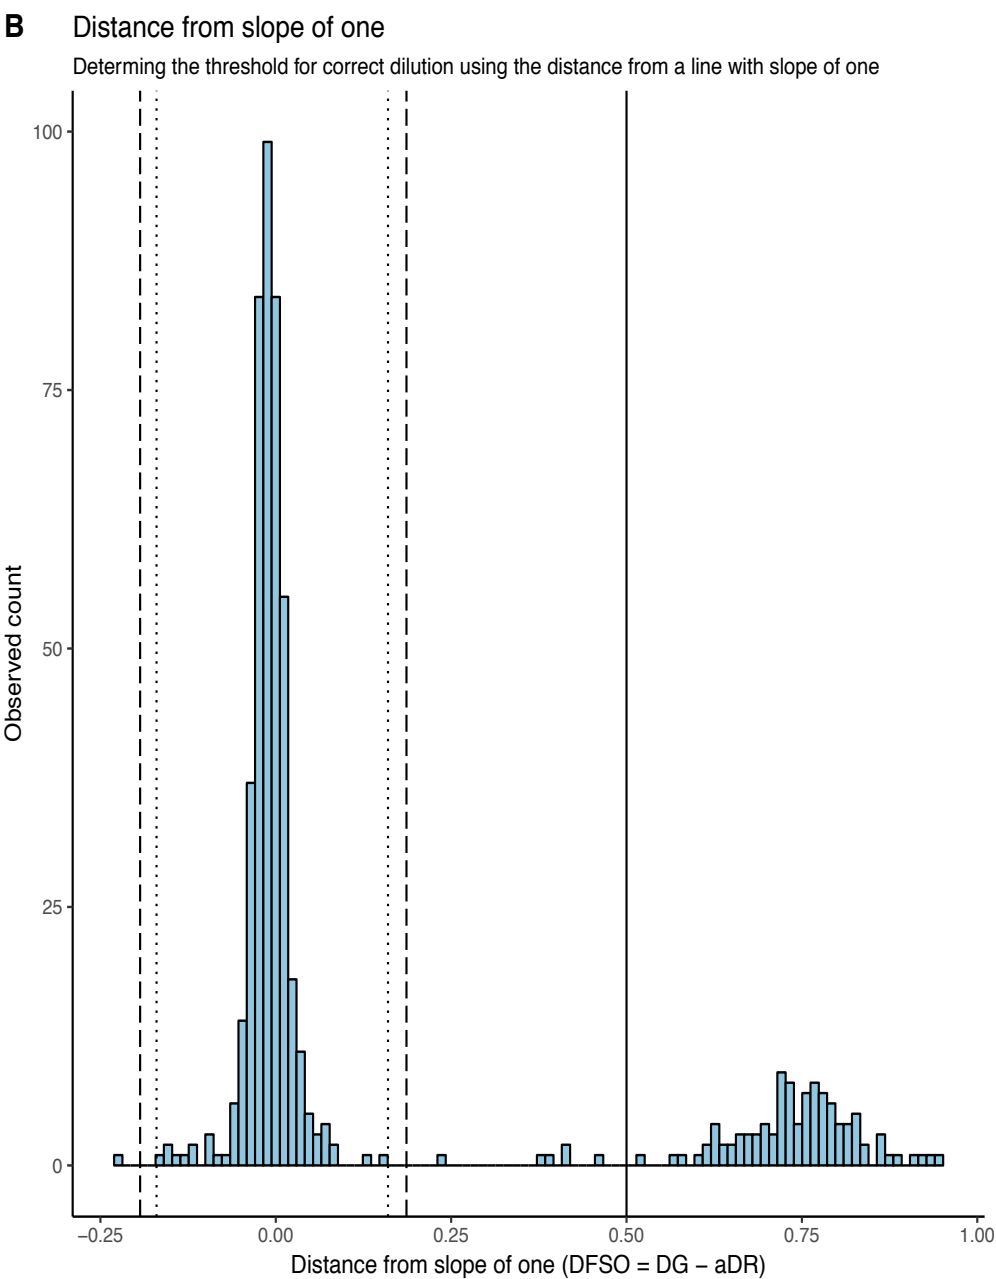

Figure S4.

**A** Distribution of SNV modeled for position specific nucleotide change

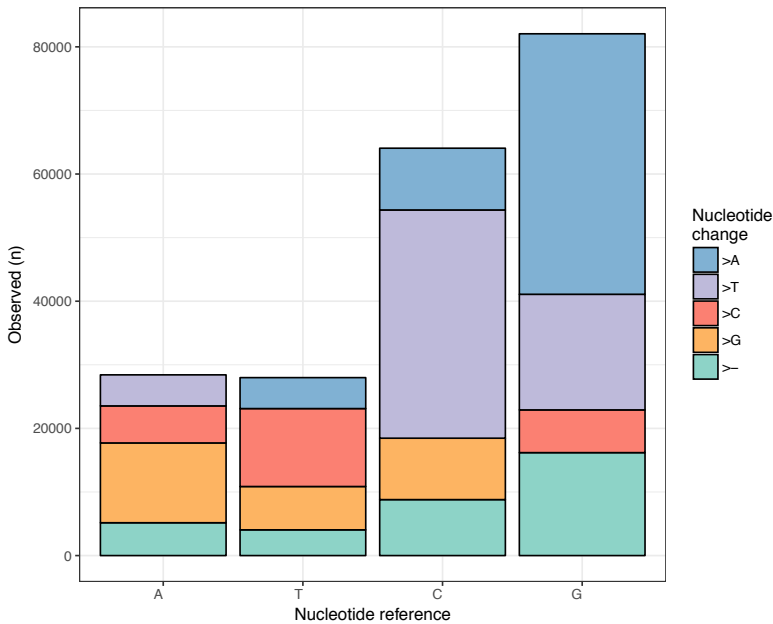

**B** Stereotypic error distribution and fitted gamma distribution

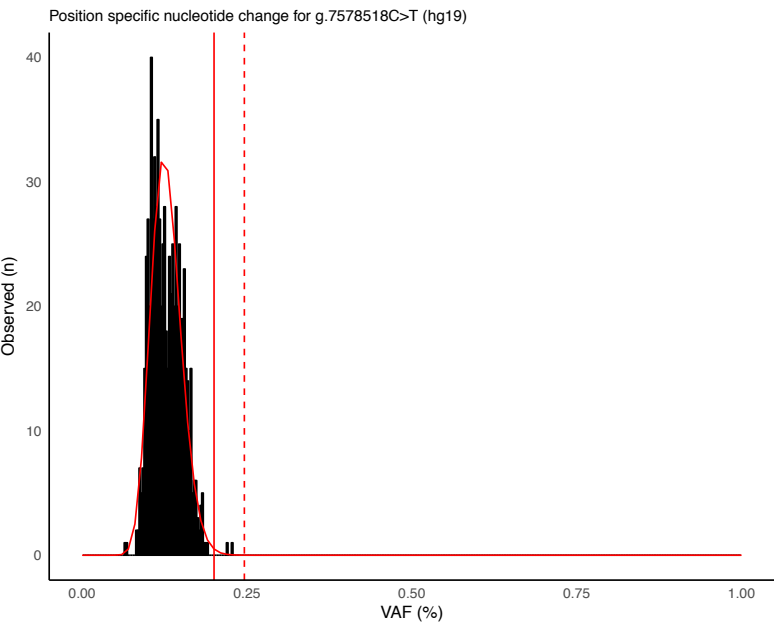

**C** Distribution of SNV modeled for specific nucleotide change

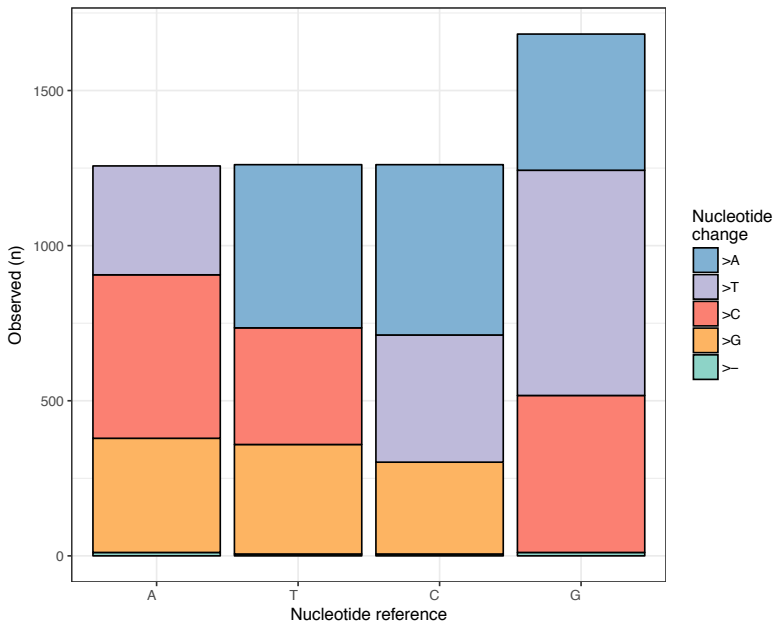

**D** Stereotypic error distribution and fitted gamma distribution

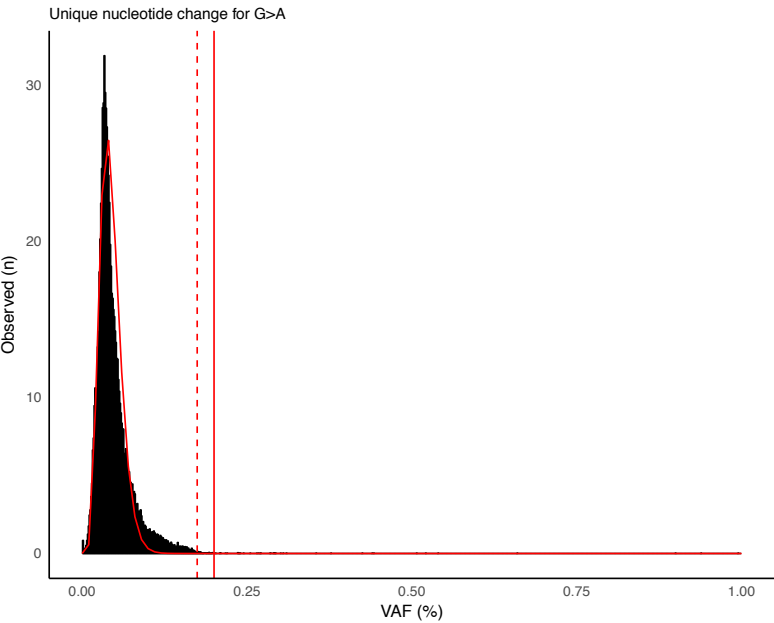

Figure S5.

**A** Thresholds for position specific nucleotide change

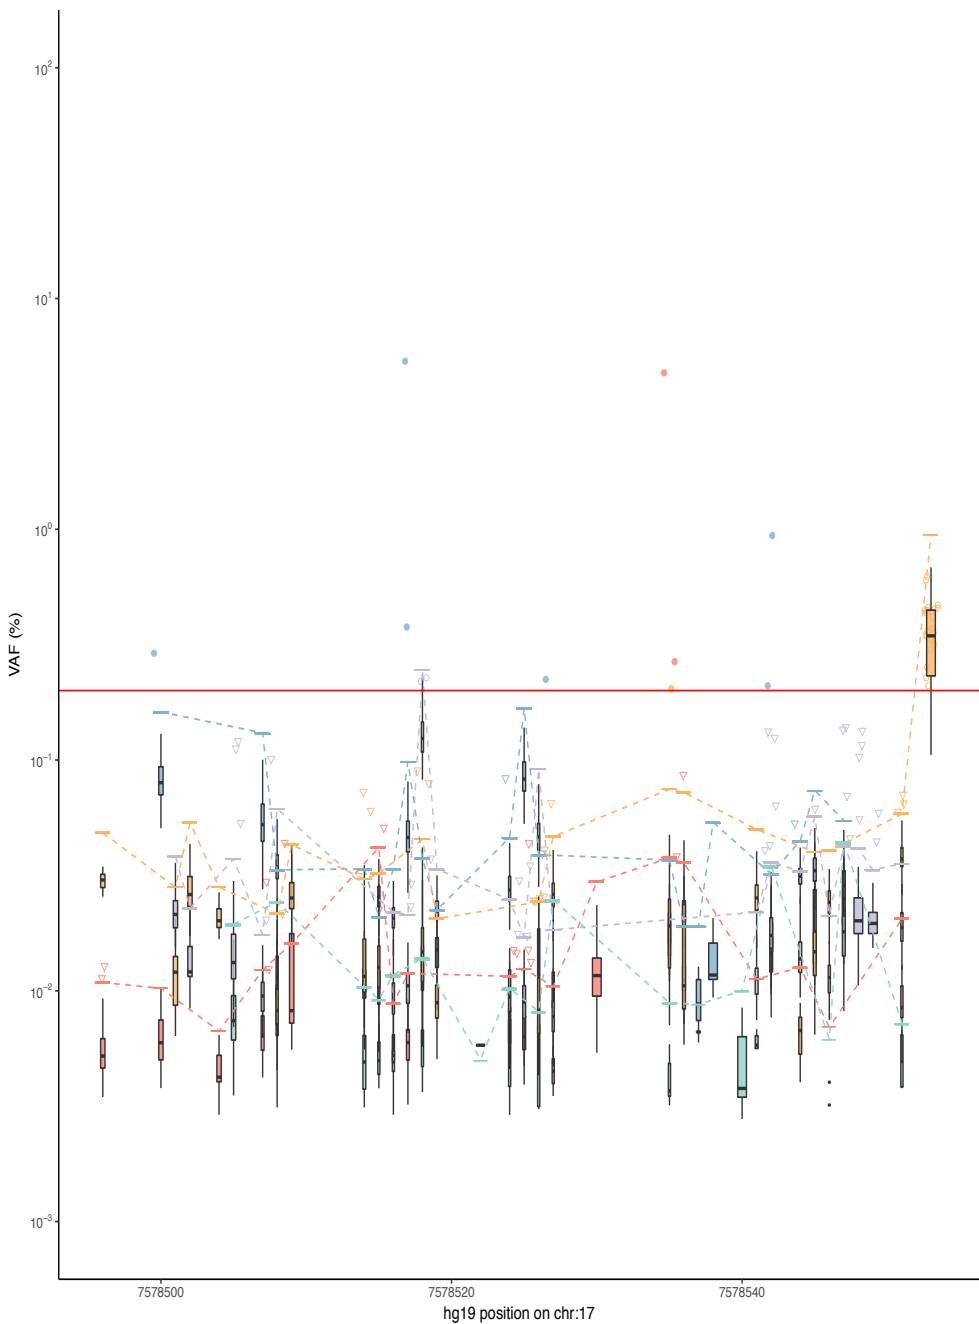

**B** Thresholds for nucleotide specific change

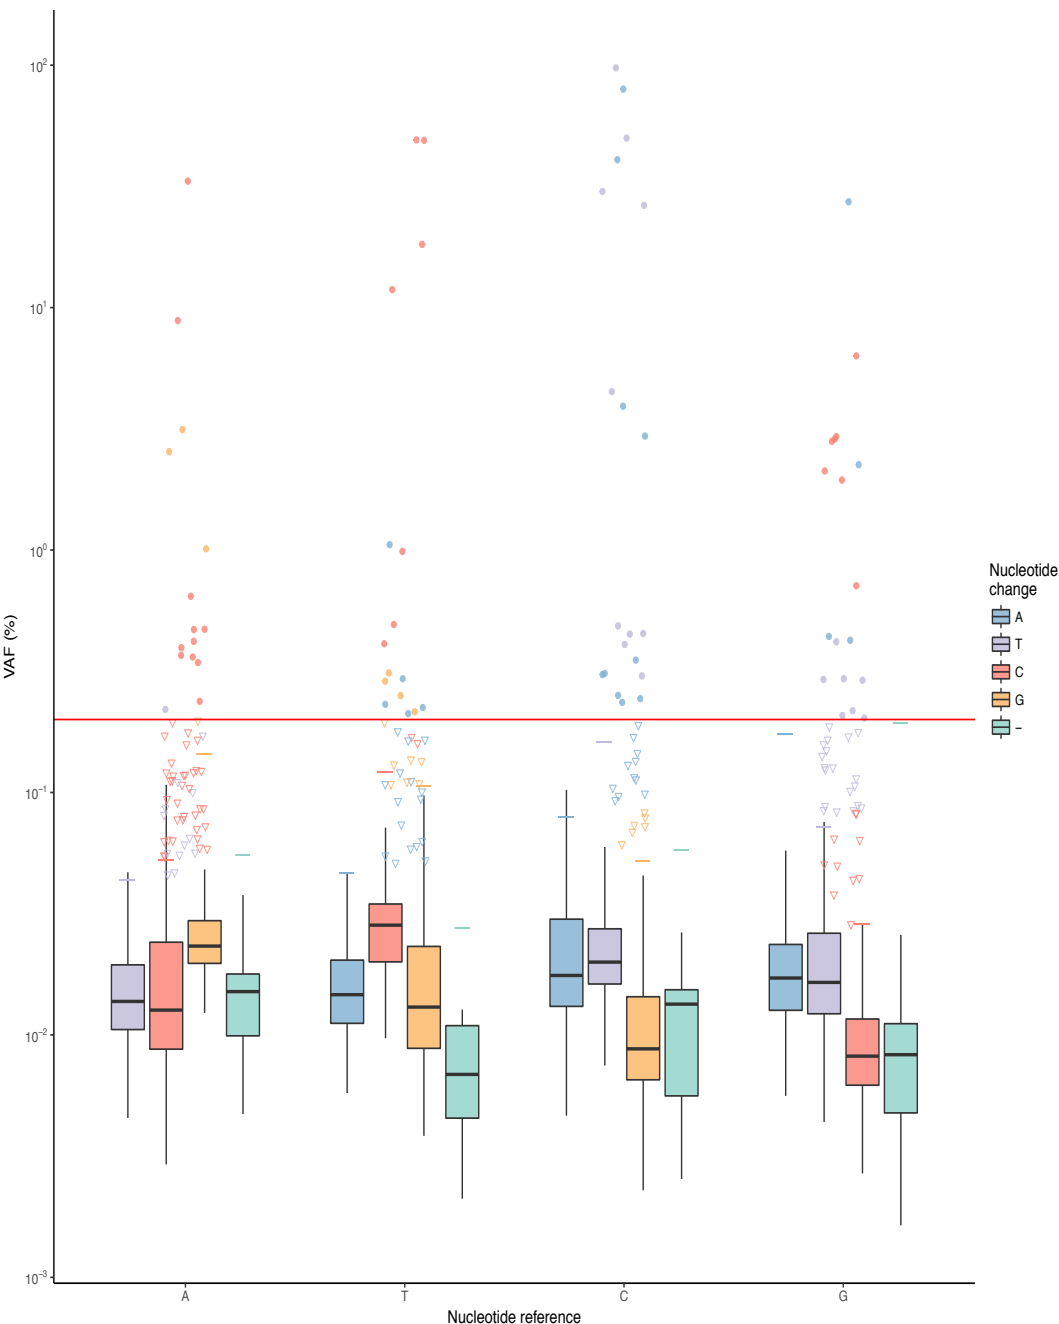

Figure S6.

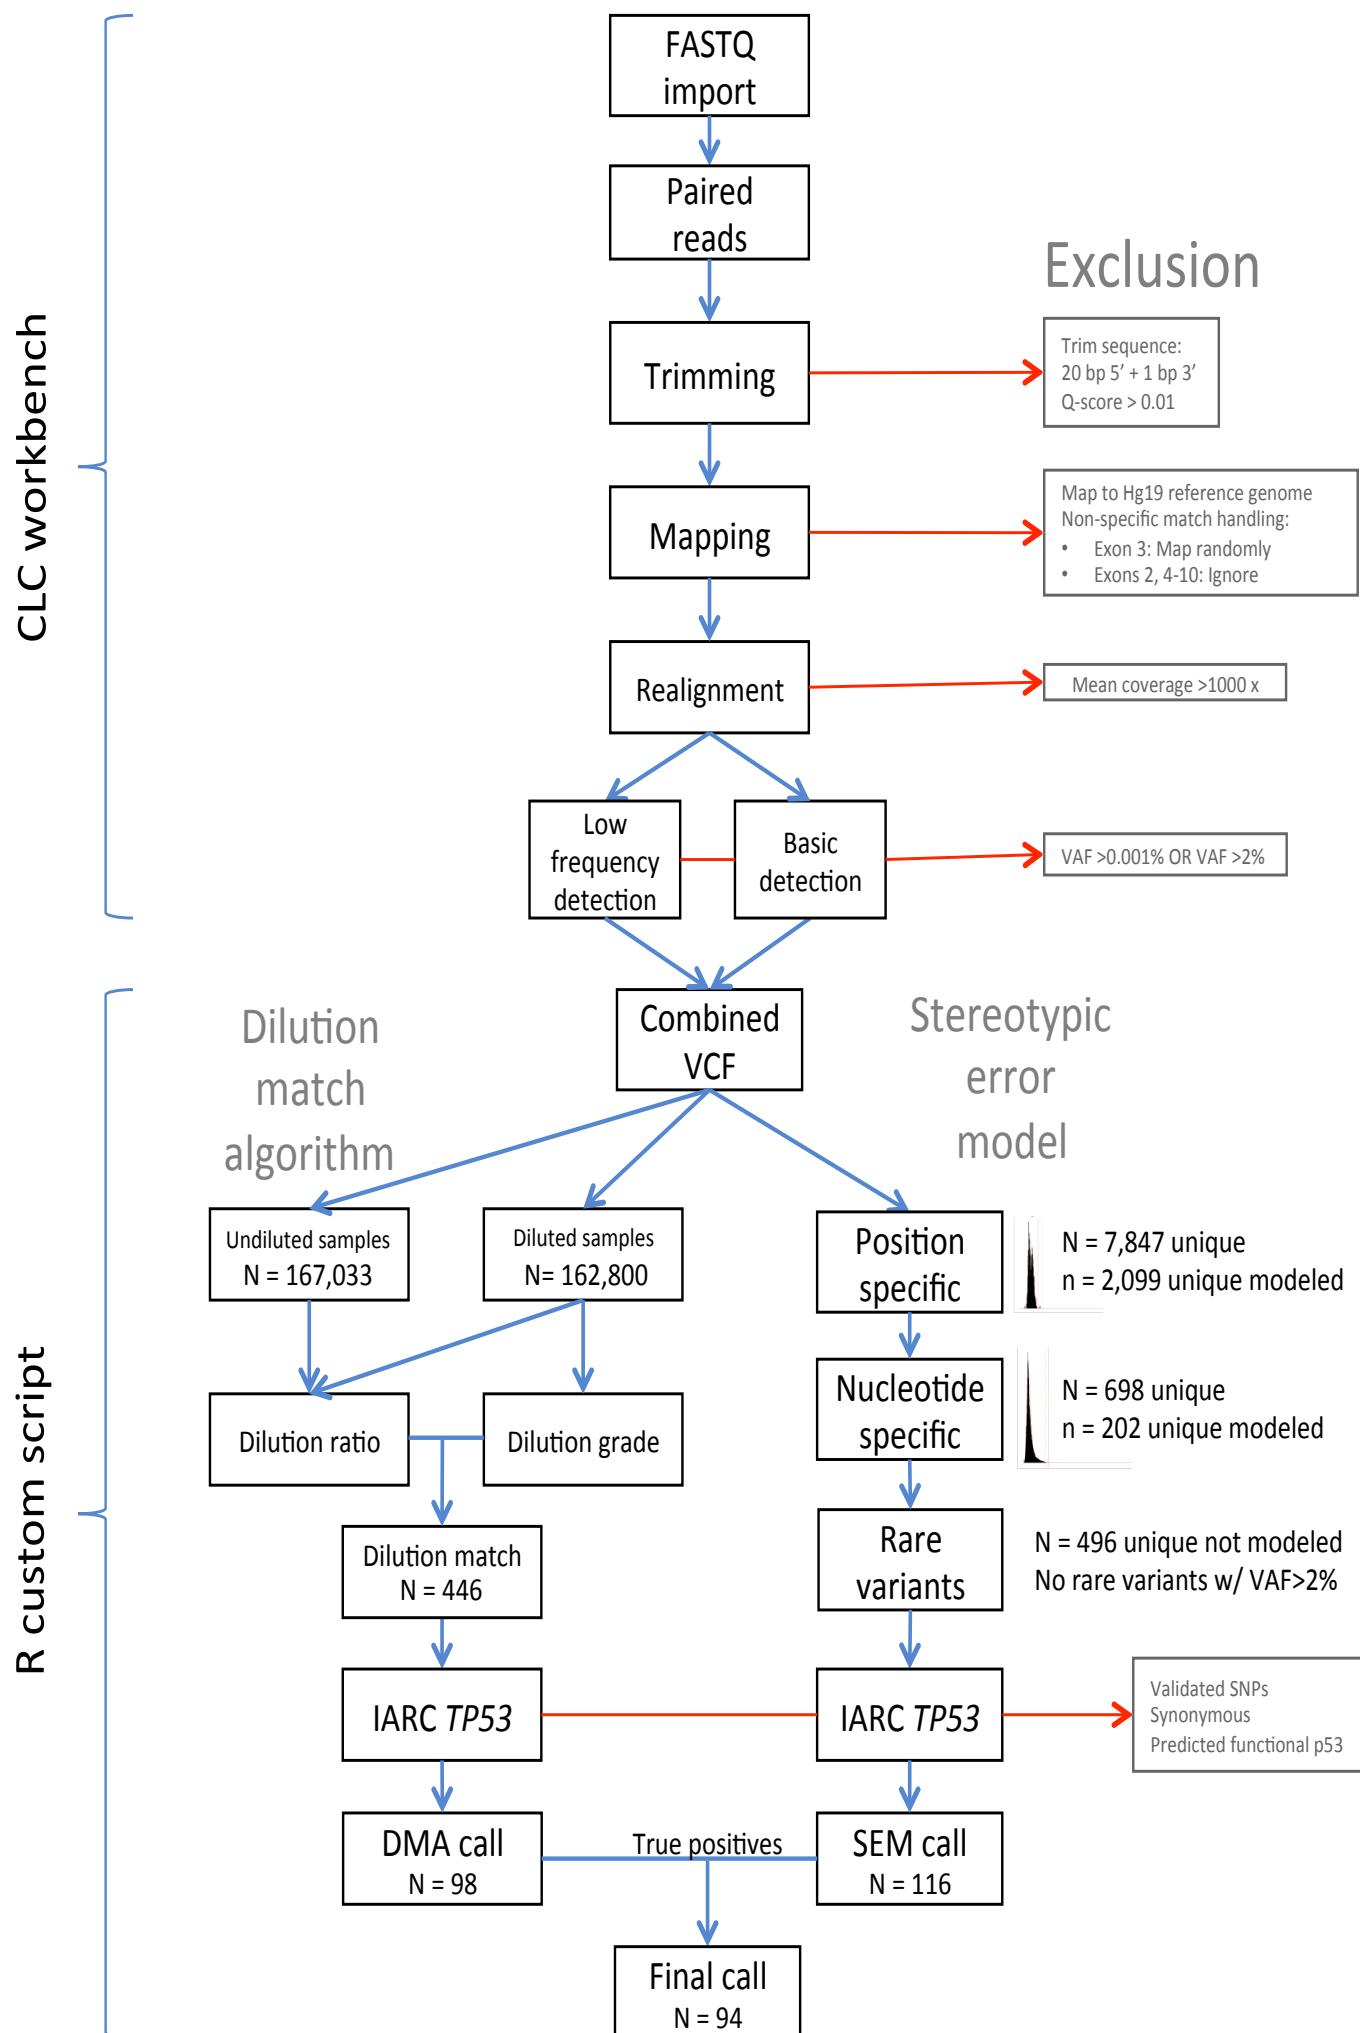

# Figure S7.

## A Stereotypic error distribution and fitted gamma distribution

Position specific nucleotide change for hg19 g.17:7577090C>T/p.Arg283His

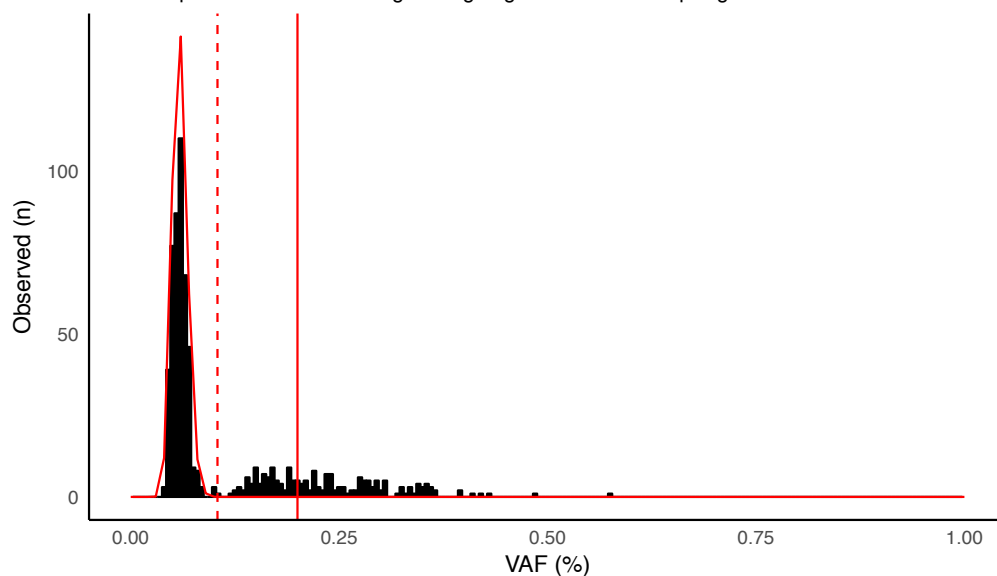

## B Stereotypic error distribution and fitted gamma distribution

Position specific nucleotide change for hg19 g.17:7577089\_7577090delGC/p.Arg283fs\*22

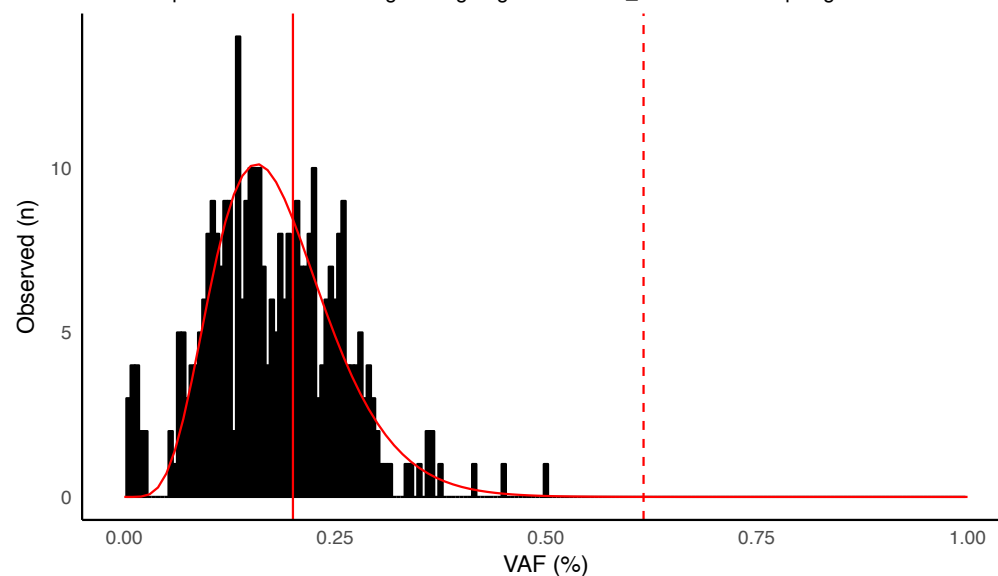

## C Stereotypic error distribution and fitted gamma distribution

Position specific nucleotide change for hg19 g.17:7578442T>C/p.Tyr163Cys

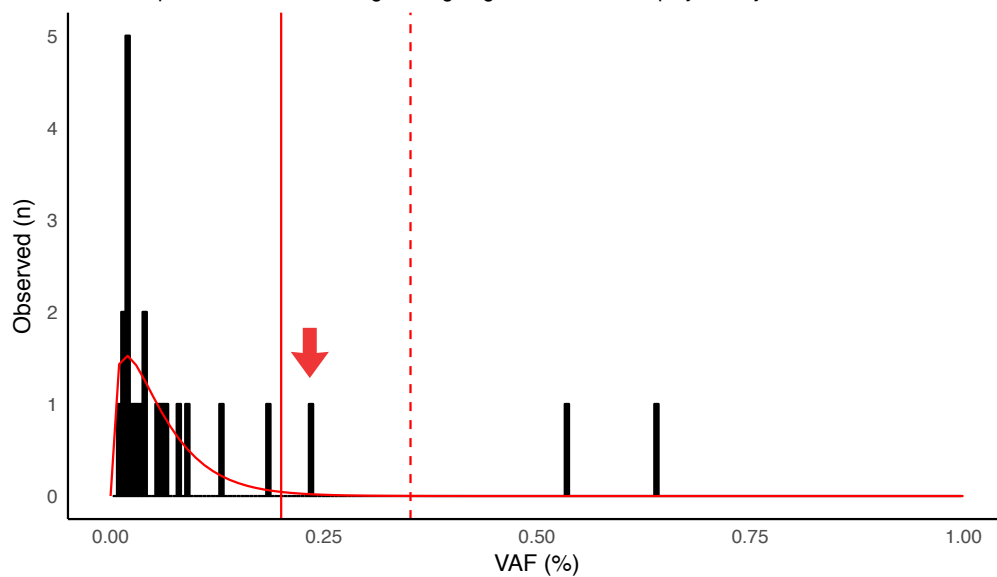

## D Stereotypic error distribution and fitted gamma distribution

Position specific nucleotide change for hg19 g.17:77579837A>C/c.74+2T>G

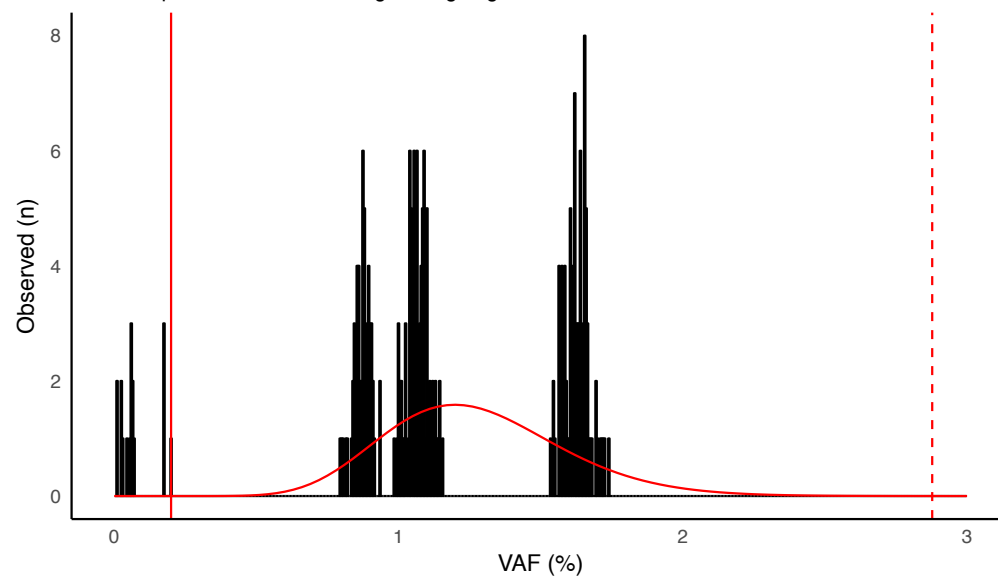

Figure S8.

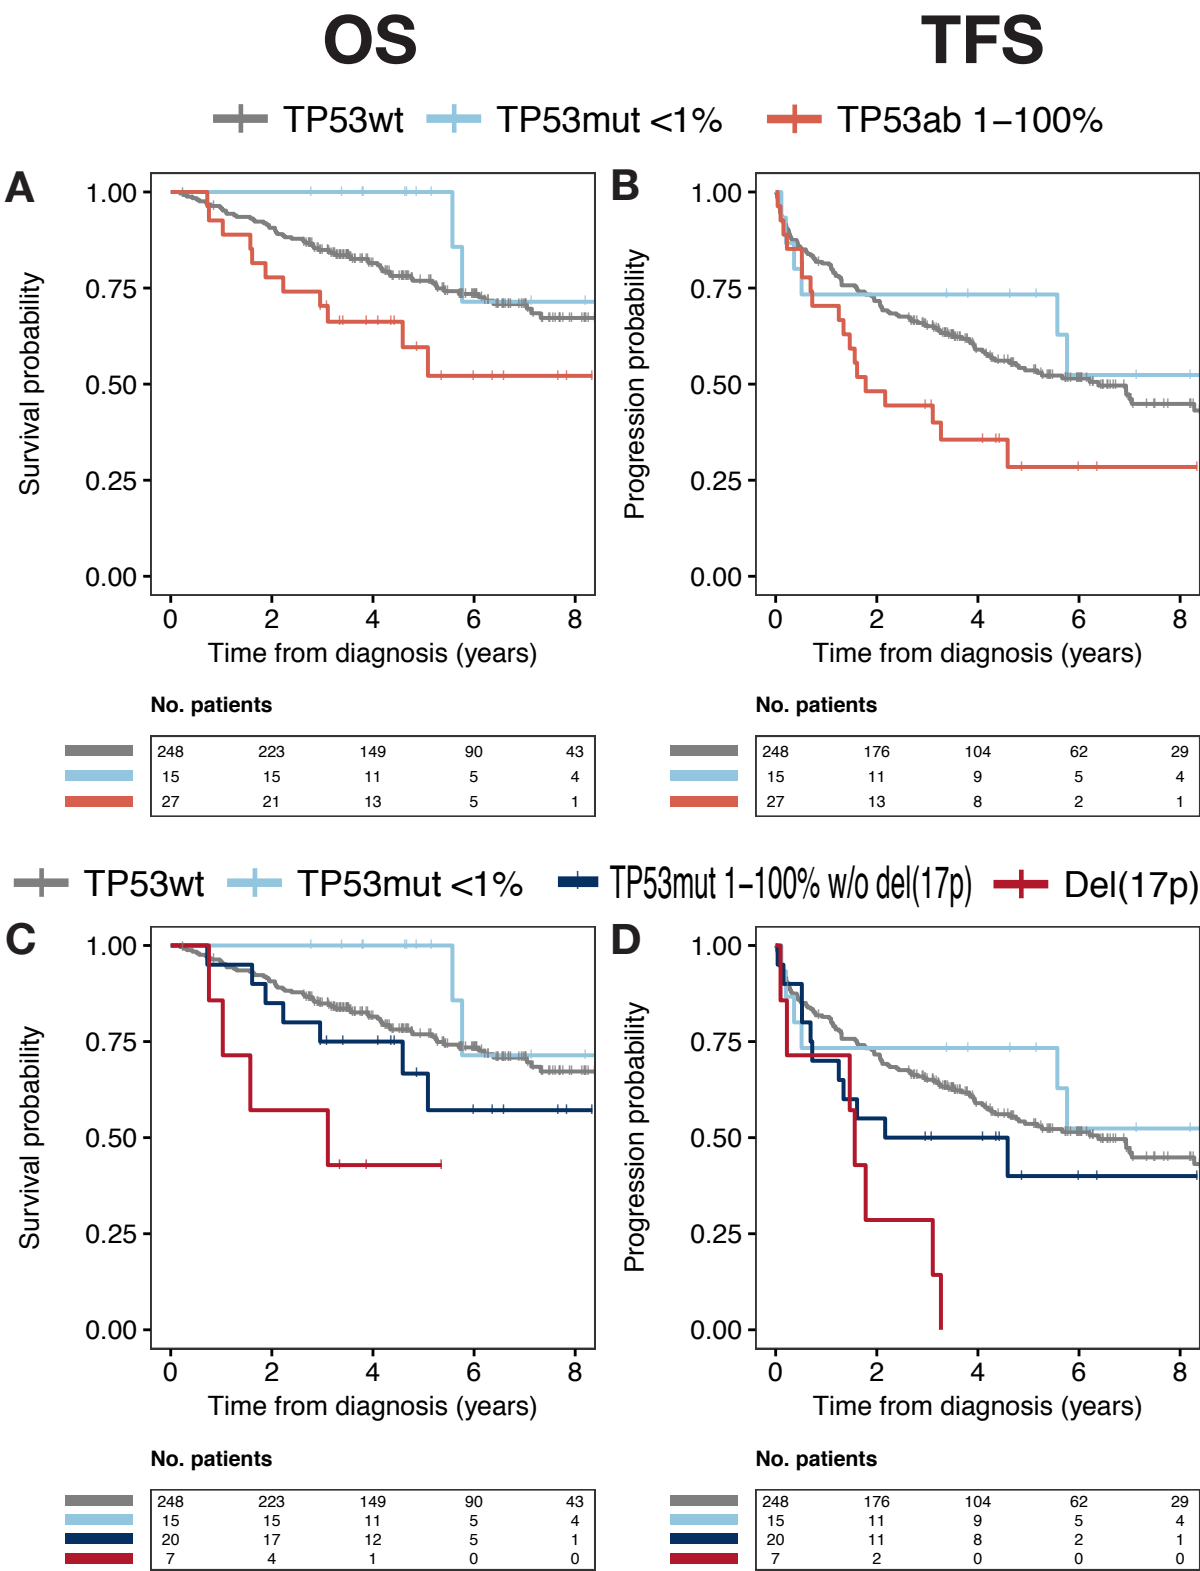

Supplement: 2018.195818.BRIEGHEL_SUPPL.pdf [file 2018.195818.BRIEGHEL_SUPPL.pdf]
